# Supplementary material for: Yolk–shell structured CoSe2/C nanospheres as multifunctional anode materials for both full/half sodium-ion and full/half potassium-ion batteries
Source: Royal Society of Chemistry journal article supplement (doi:10.1039/d1nr01227d), 2021-01-01
Supplement: d1nr01227d1.pdf [file d1nr01227d1.pdf]

## Supporting Information

### **Yolk-Shell Structured CoSe<sub>2</sub>/C Nanospheres as Multifunctional Anode Materials for Both Full/Half Sodium-Ion and Full/Half Potassium-Ion Batteries**

*Xiuping Sun,<sup>a</sup> Suyuan Zeng,<sup>b</sup> Ruxia Man,<sup>a</sup> Lu Wang<sup>a</sup>, Bo Zhang,<sup>a</sup> Fang Tian,<sup>a</sup> Yanjun Zhai,<sup>b</sup> Yitai Qian<sup>a</sup> and Liqiang Xu<sup>\*a</sup>*

<sup>a</sup> Key Laboratory of Colloid and Interface Chemistry, Ministry of Education, School of Chemistry and Chemical Engineering, Shandong University, Jinan 250100, China.

E-mail: [xulq@sdu.edu.cn](mailto:xulq@sdu.edu.cn).

<sup>b</sup> Shandong Provincial Key Laboratory / Collaborative Innovation Center of Chemical Energy Storage & Novel Cell Technology, Liaocheng University, China

## Content

### Figure Captions:

- Fig. S1.** The amount of  $\text{Co}(\text{NO}_3)_2 \cdot 6\text{H}_2\text{O}$  is (a) 0.7 mmol, (b) 0.5 mmol, (c) 0.3 mmol, (d) 0.2 mmol, (e) 0.1 mmol to form the cobalt glycerate solid spheres.
- Fig. S2.** The effect of nanosphere size on performances: when added cobalt salt 0.7 mmol, the size of nanosphere is about 980 nm and when added cobalt salt 0.2 mmol, the size of nanosphere is about 450 nm.
- Fig. S3** (a, b) FESEM images (c) TEM image of Co-glycerate spheres.
- Fig. S4** (a) FESEM image (b) TEM image of  $\text{CoSe}_2/\text{C}$ .
- Fig. S5** (a) FESEM image (b) TEM image (c) EDX mapping images (Co, O) of  $\text{Co}_3\text{O}_4$ .
- Fig. S6** XPS spectrum of  $\text{CoSe}_2/\text{C}$ .
- Fig. S7**  $\text{N}_2$  adsorption/desorption isotherms of  $\text{Co}_3\text{O}_4$ .
- Fig. S8** TGA and DTA curves of (a) Co-glycerate spheres were annealed in air atmosphere, (b) Co-glycerate spheres were annealed in  $\text{N}_2$  atmosphere.
- Fig. S9** FESEM images of (a, b, c) Co-glycerate spheres were annealed in  $\text{N}_2$  atmosphere at different temperature.
- Fig. S10** XRD patterns of Co-glycerate spheres were annealed in  $\text{N}_2$  atmosphere at different temperature.
- Fig. S11** FESEM images of (a, b, c) Co-glycerate spheres were annealed in air atmosphere at different temperature.
- Fig. S12** XRD patterns of Co-glycerate spheres were annealed in air atmosphere at different temperature.
- Fig. S13** Raman spectrum of  $\text{CoSe}_2/\text{C}$ .
- Fig. S14** (a) Charge-discharge curves of the first cycle at  $100 \text{ mA g}^{-1}$ , (b) ex-situ XRD patterns of  $\text{CoSe}_2/\text{C}$  for SIBs, SEM images of  $\text{CoSe}_2/\text{C}$  (c) discharge to 0.5 V, (d) charge to 2.9 V.
- Fig. S15** Elemental mapping of  $\text{CoSe}_2/\text{C}$  after 100 cycles at  $500 \text{ mA g}^{-1}$  for SIBs.
- Fig. S16** Cycling performance of  $\text{CoSe}_2/\text{C}$  at  $1 \text{ A g}^{-1}$  in SIBs.
- Fig. S17** Cycling performance of  $\text{CoSe}_2/\text{C}$  at  $8 \text{ A g}^{-1}$  in SIBs.

- Fig. S18** The cycling performances at 500 mA g<sup>-1</sup> in different electrolyte for SIBs (a) 1 M NaClO<sub>4</sub> in EC: DEC (1:1 Vol%) containing 5 wt.% FEC and 1 M NaPF<sub>6</sub> in EC: DEC (1:1 Vol%) containing 2 wt.% FEC, the cycling performances at 100 mA g<sup>-1</sup> (b) 0.8 M KPF<sub>6</sub> in EC: DEC (1:1 Vol%) was used as electrolyte for PIBs.
- Fig. S19** (a) Electrochemical impedance spectra of CoSe<sub>2</sub>/C and Co<sub>3</sub>O<sub>4</sub> before cycle for SIBs, (b) The relationship between Z' and  $\omega^{-1/2}$  for CoSe<sub>2</sub>/C and Co<sub>3</sub>O<sub>4</sub> in the low-frequency region.
- Fig. S20** (a) XRD pattern, (b) FESEM image of Na<sub>3</sub>V<sub>2</sub>(PO<sub>4</sub>)<sub>3</sub>@rGO.
- Fig. S21** (a) The working principle of SIBs full-cell with a CoSe<sub>2</sub>/C anode and a Na<sub>3</sub>V<sub>2</sub>(PO<sub>4</sub>)<sub>3</sub>@rGO cathode, (b) charge-discharge curves of the 1<sup>st</sup> cycle at 1A g<sup>-1</sup>, (c) rate performance, (d) cycling performances of CoSe<sub>2</sub>/C//Na<sub>3</sub>V<sub>2</sub>(PO<sub>4</sub>)<sub>3</sub>@rGO in SIBs full-cell at 1 A g<sup>-1</sup>.
- Fig. S22** Charge-discharge curves of CoSe<sub>2</sub>/C at 50 mA g<sup>-1</sup> in PIBs.
- Fig. S23** When the mass load of CoSe<sub>2</sub>/C was 6.3 mg cm<sup>-2</sup> for potassium ion battery, charge-discharge curves at 50 mA g<sup>-1</sup>.
- Fig. S24** Comparison the performance of CoSe<sub>2</sub>/C with recently reported materials in PIBs.
- Fig. S25** FESEM images of (a) PTCDA, (b) PTCDA-450, (c) XRD patterns of PTCDA and PTCDA-450.
- Fig. S26** Photos of disassembled battery after cycling (a) the electrode of PTCDA-450, (b) the side of separator contact with PTCDA-450 electrode directly, (c) the other side of separator, (d) the cycling performance of PTCDA-450 at 100 mA g<sup>-1</sup> in half potassium ion battery.
- Fig. S27** The charge-discharge curves of CoSe<sub>2</sub>/C//PTCDA-450 of the first cycle at 100 mA g<sup>-1</sup> in PIBs full-cell.

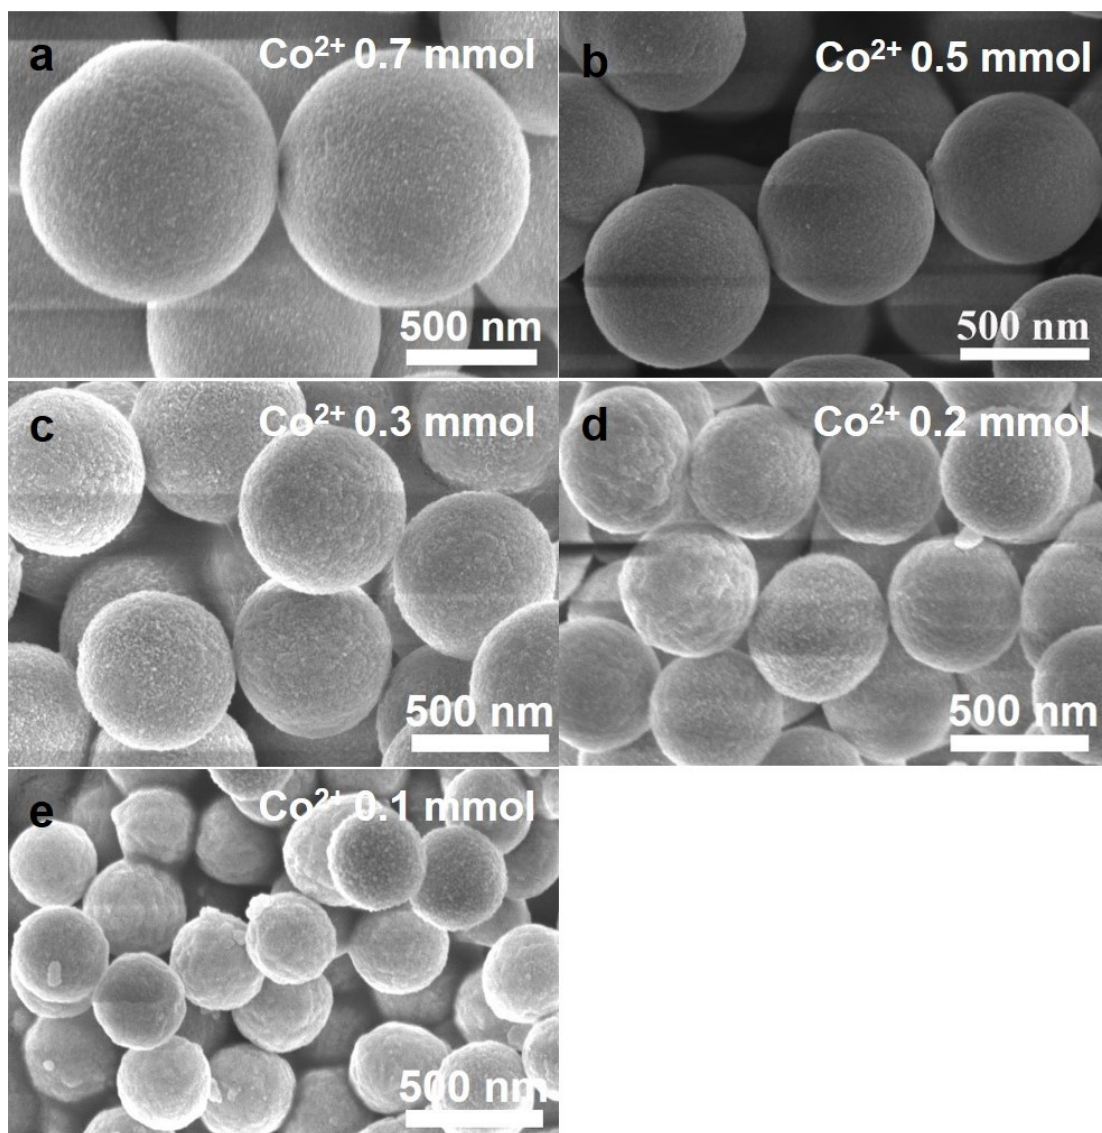

**Fig. S1** the amount of  $\text{Co}(\text{NO}_3)_2 \cdot 6\text{H}_2\text{O}$  is (a) 0.7 mmol, (b) 0.5 mmol, (c) 0.3 mmol, (d) 0.2 mmol, (e) 0.1 mmol to form the cobalt glycerate solid spheres.

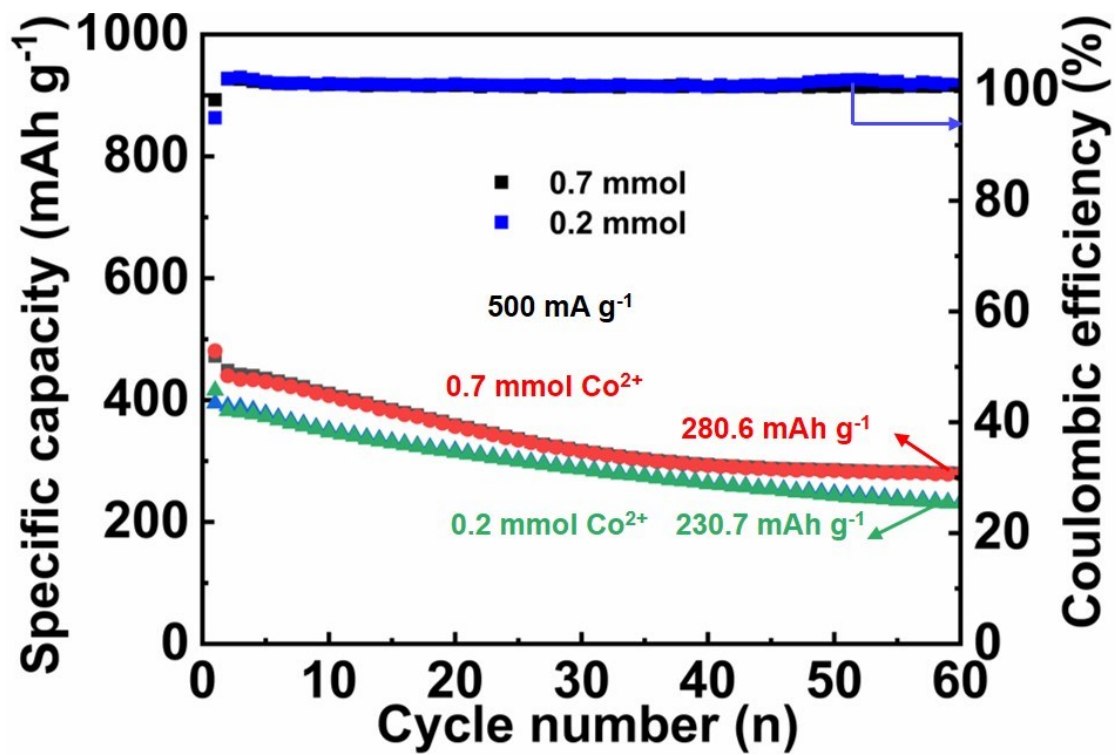

Fig. S2 The effect of nanosphere size on performances: when added cobalt salt 0.7 mmol, the size of nanosphere is about 980 nm and when added cobalt salt 0.2 mmol, the size of nanosphere is about 450 nm.

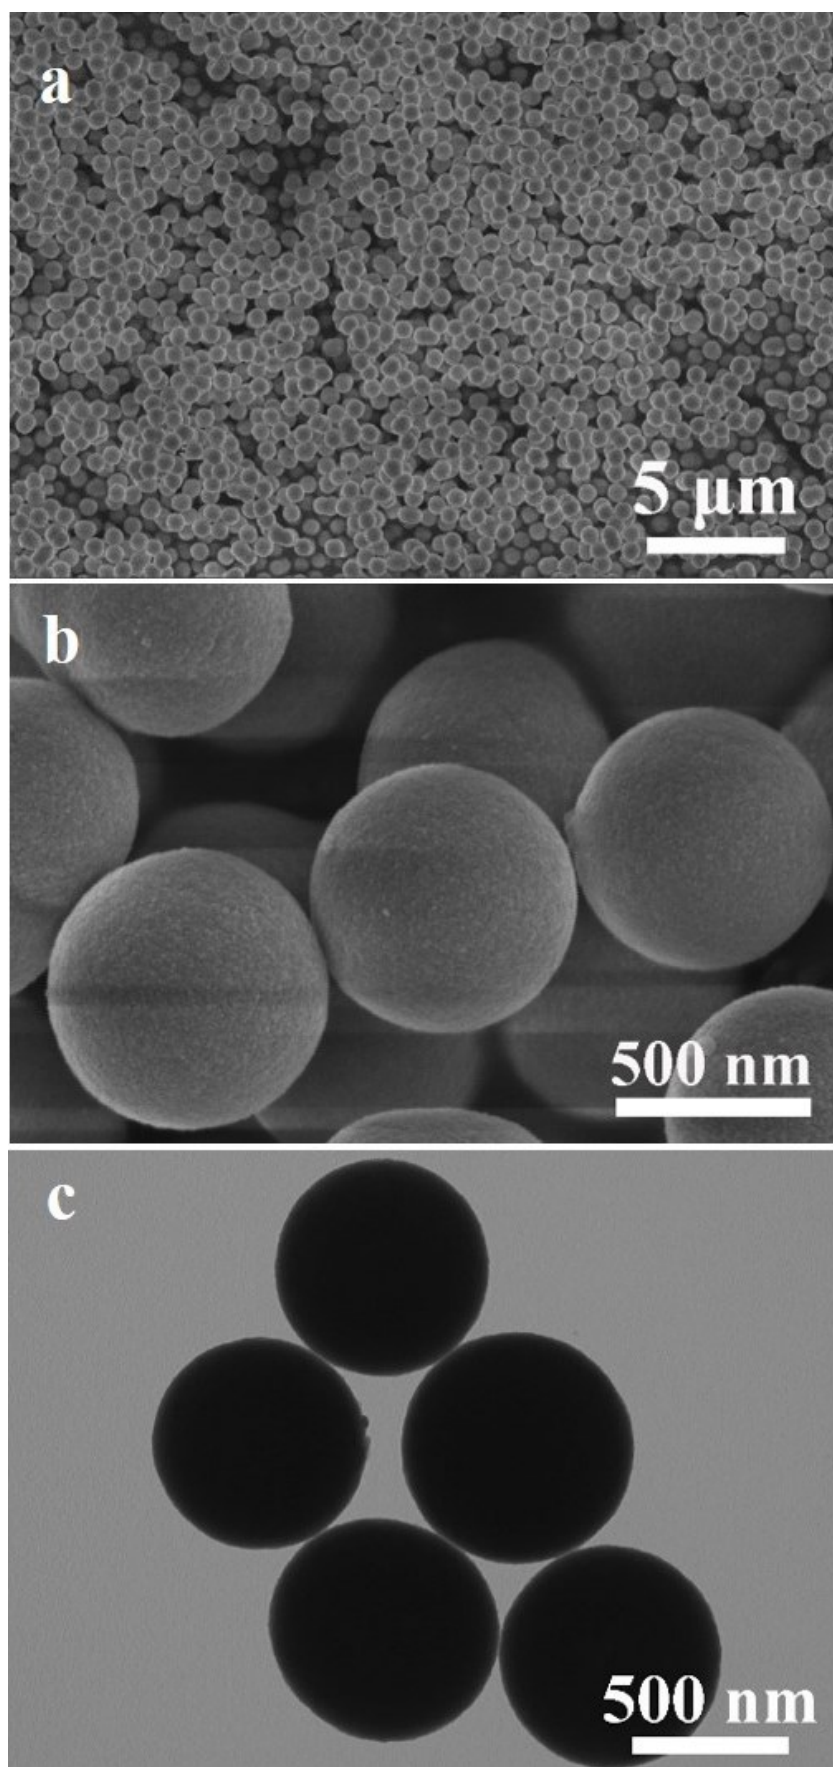

**Fig. S3** (a, b) FESEM images (c) TEM image of Co-glycerate spheres.



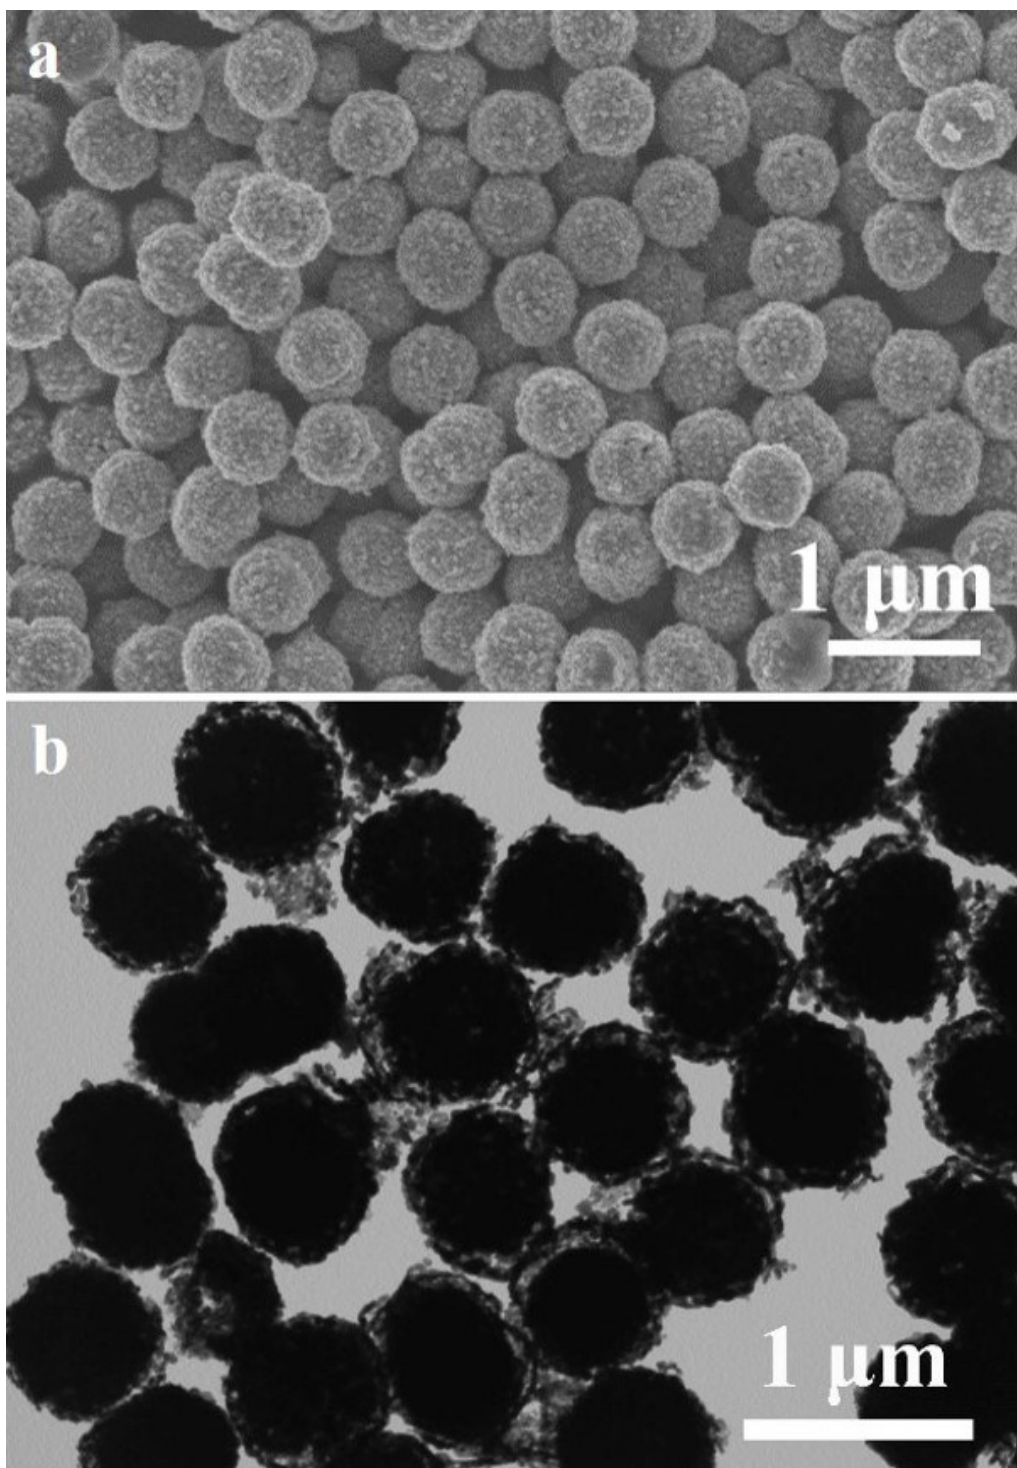

**Fig. S4** (a) FESEM image (b) TEM image of CoSe<sub>2</sub>/C.

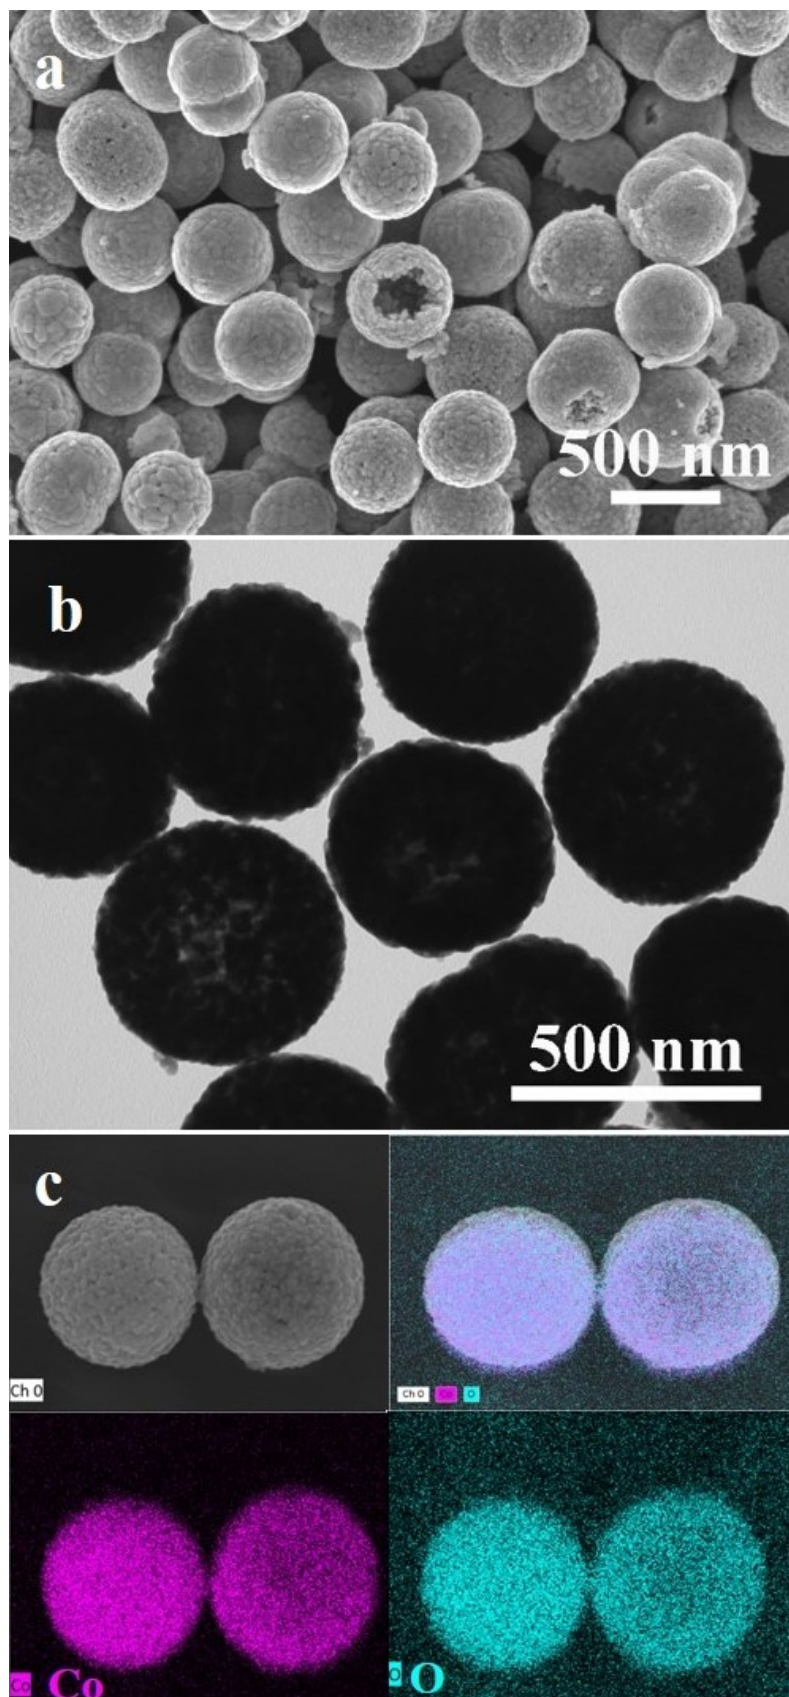

**Fig. S5** (a) FESEM image (b) TEM image (c) EDX mapping images (Co, O) of  $\text{Co}_3\text{O}_4$ .



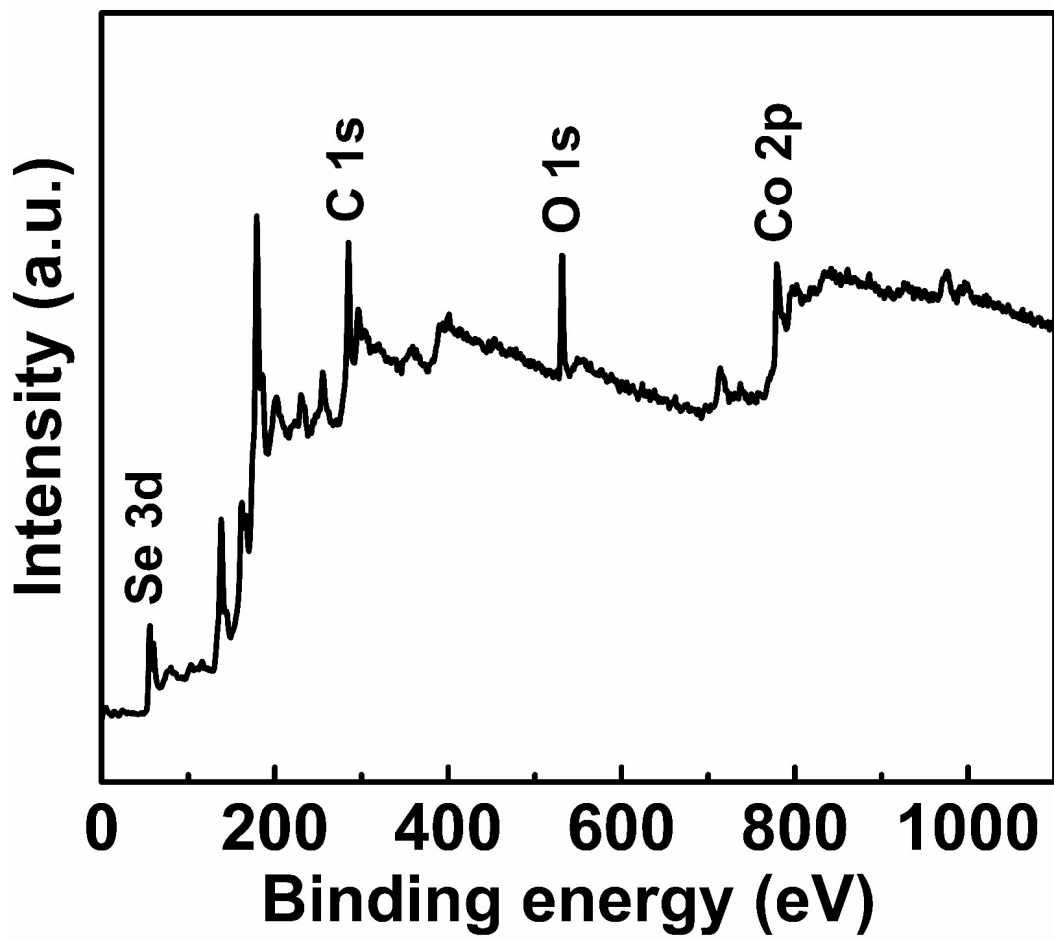

Fig. S6 XPS spectrum of CoSe<sub>2</sub>/C.

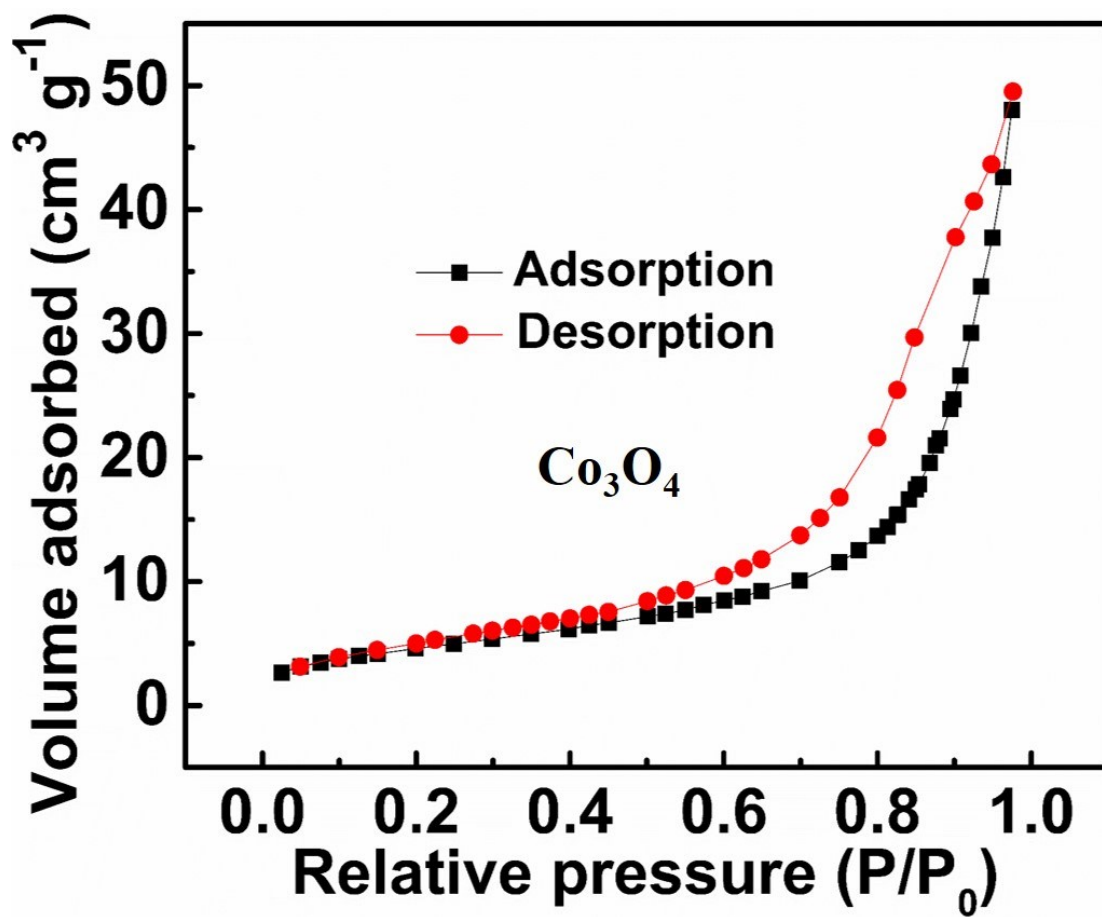

Fig. S7  $\text{N}_2$  adsorption/desorption isotherms of  $\text{Co}_3\text{O}_4$ .

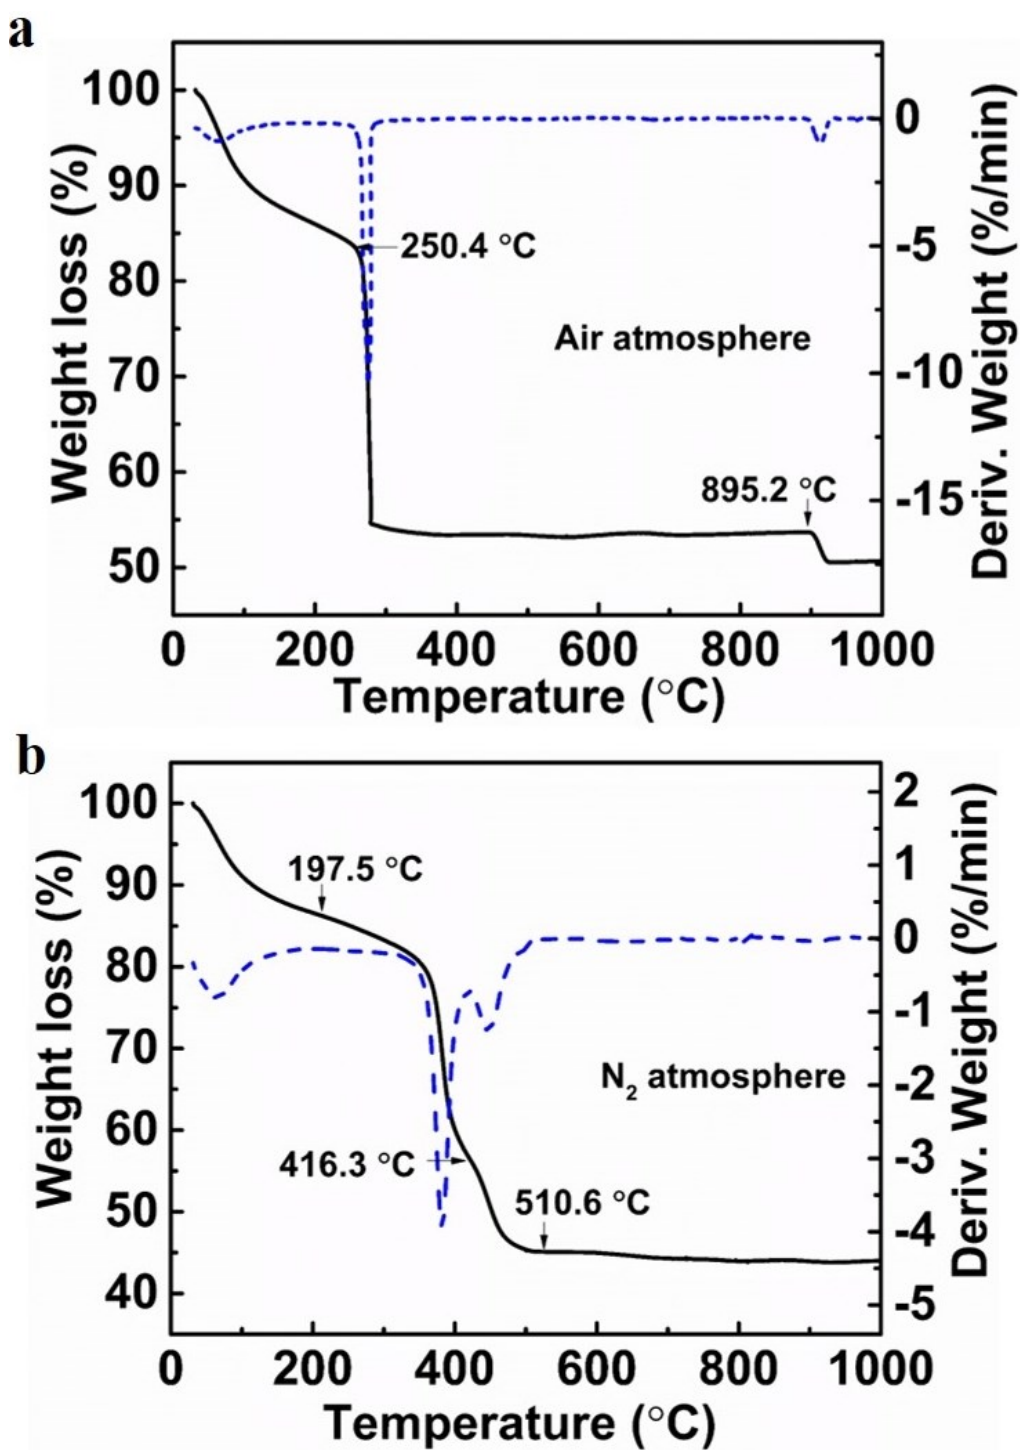

Fig. S8 TGA and DTA curves of (a) Co-glycerate spheres were annealed in air atmosphere, (b) Co-glycerate spheres were annealed in N<sub>2</sub> atmosphere.

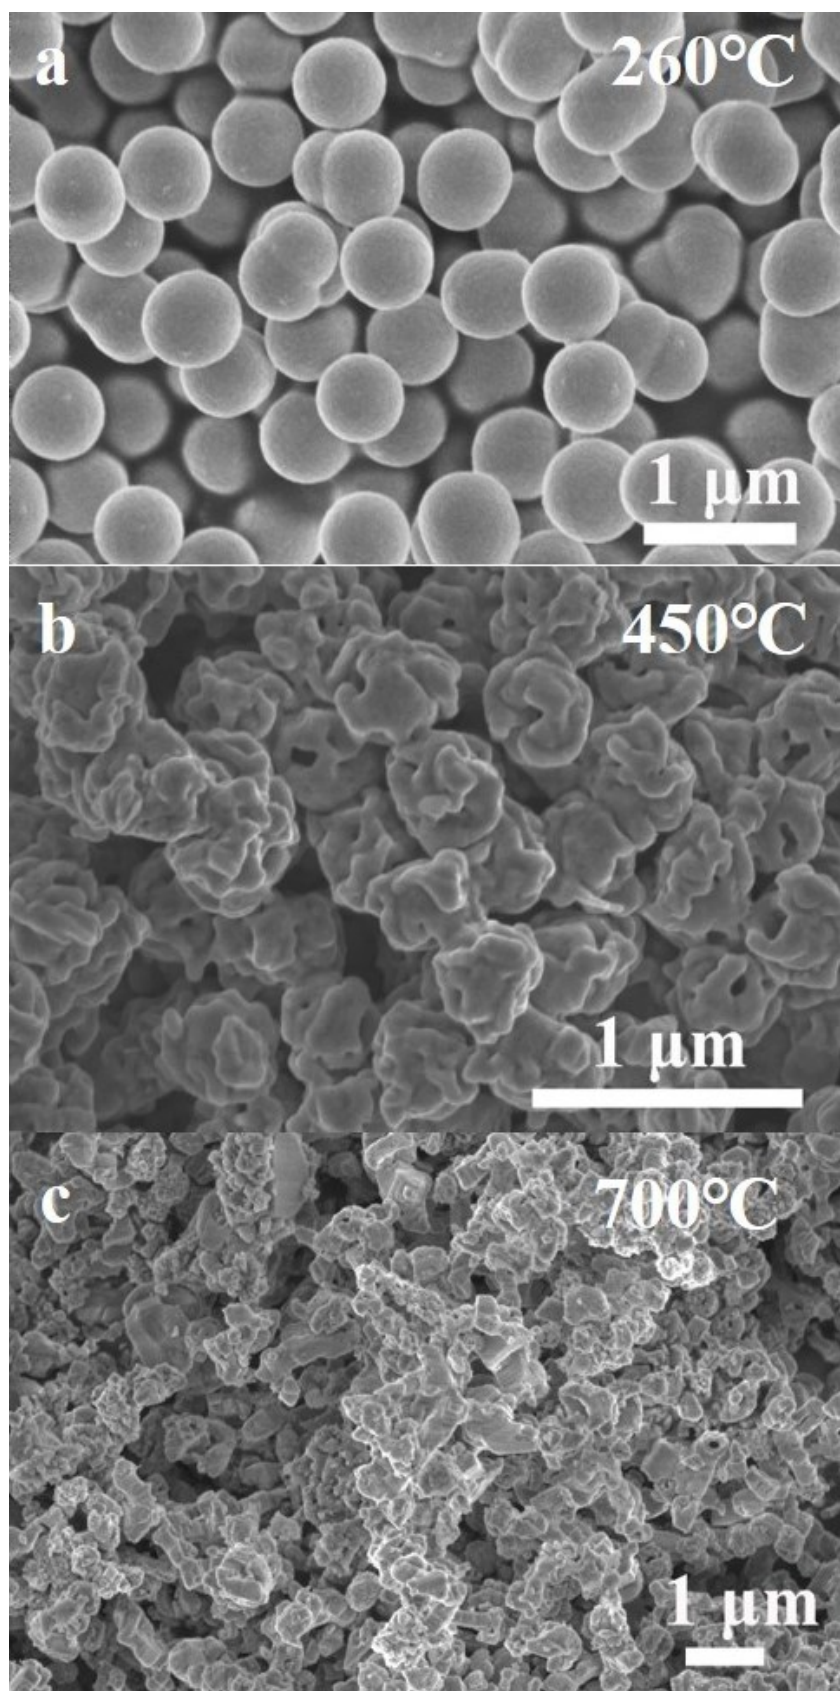

**Fig. S9** FESEM images of (a, b, c) Co-glycerate spheres were annealed in N<sub>2</sub> atmosphere at different temperature.

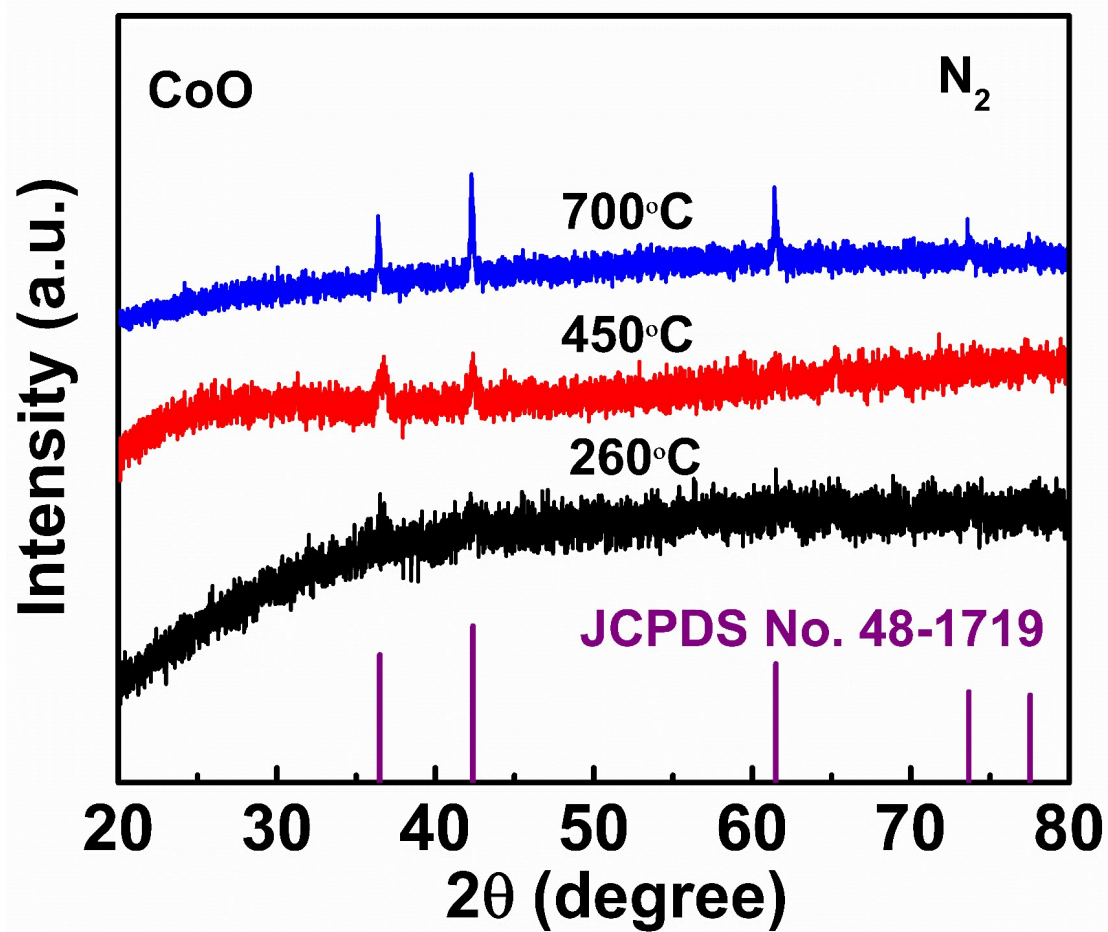

Fig. S10 XRD patterns of Co-glycerate spheres were annealed in N<sub>2</sub> atmosphere at different temperature.



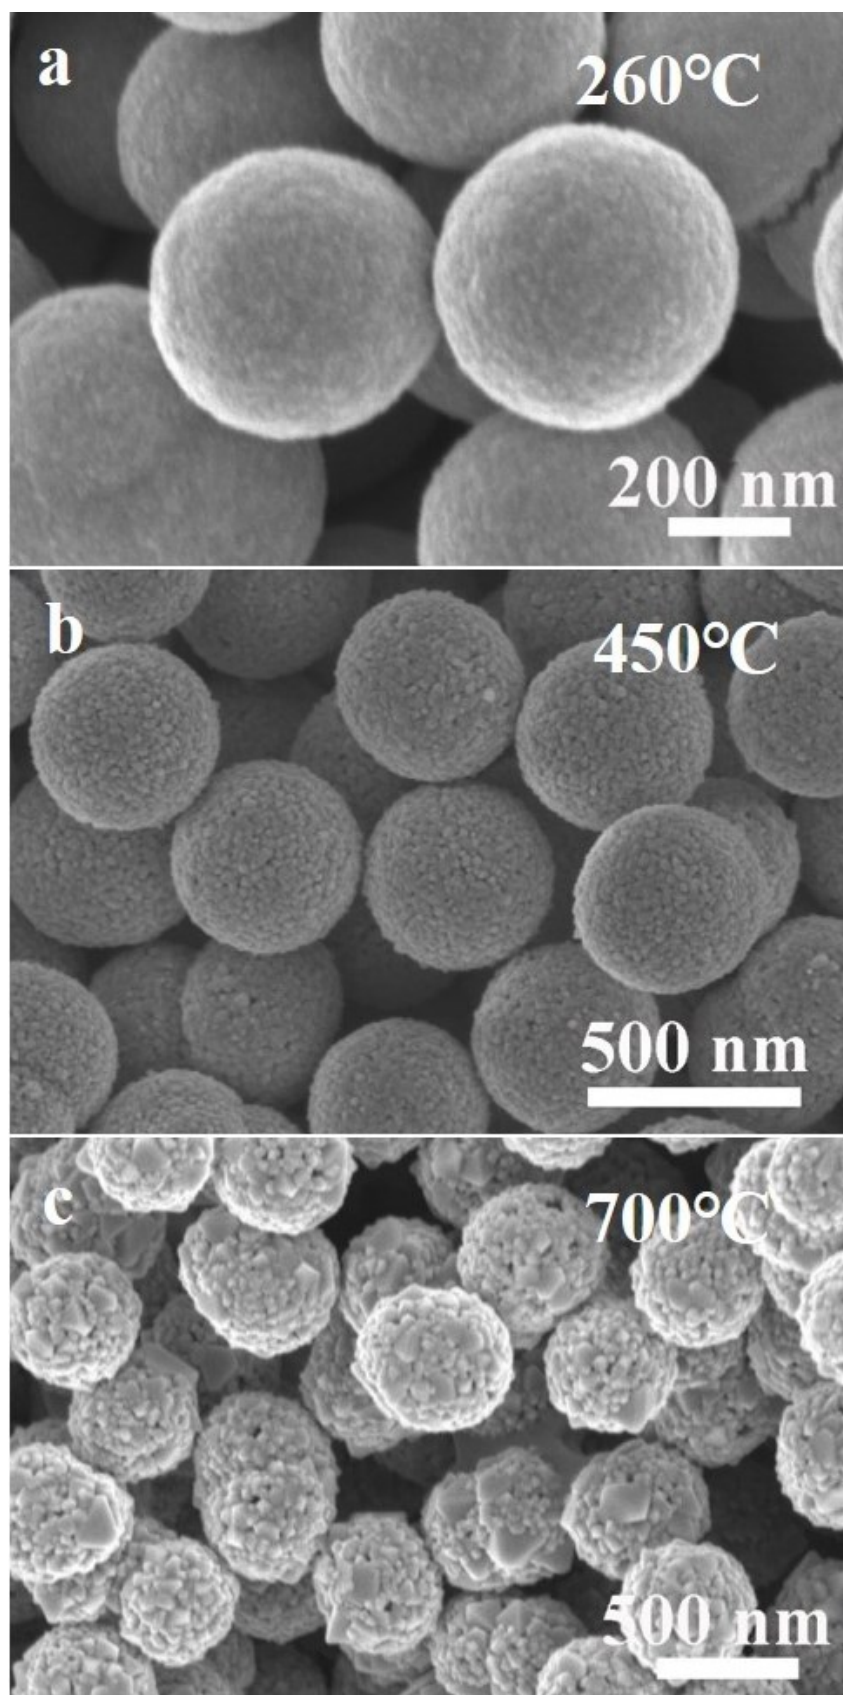

**Fig. S11** FESEM images of (a, b, c) Co-glycerate spheres were annealed in air atmosphere at different temperature.



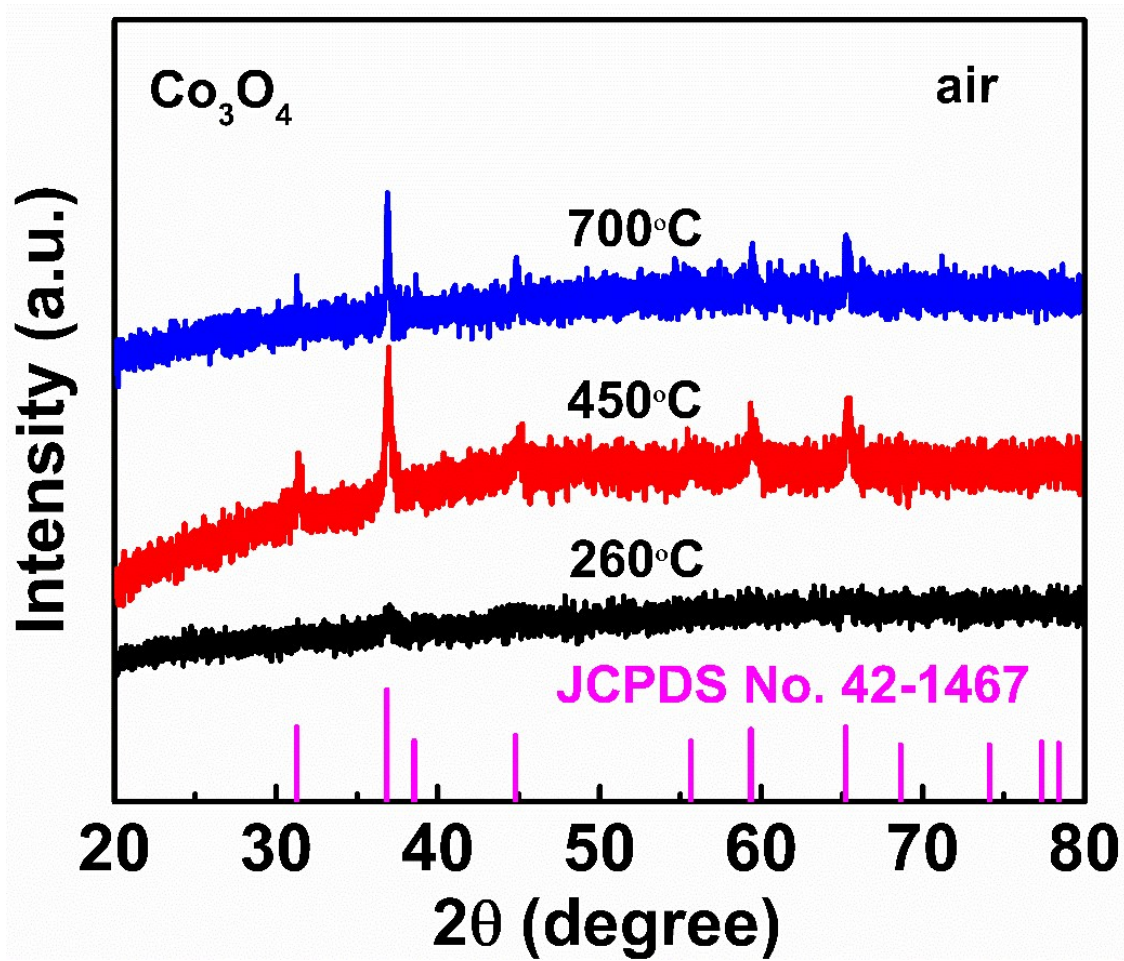

Fig. S12 XRD patterns of Co-glycerate spheres were annealed in air atmosphere at different temperature.

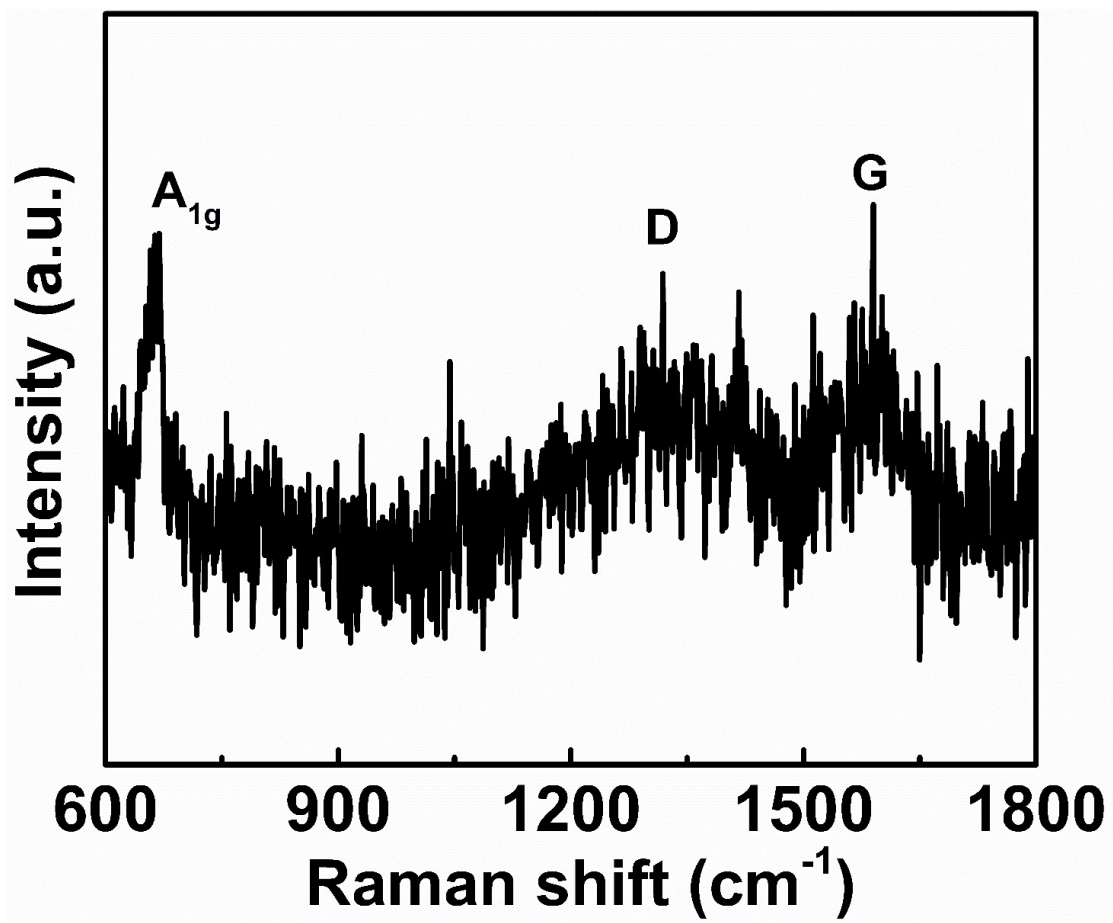

Fig. S13 Raman spectrum of CoSe<sub>2</sub>/C.

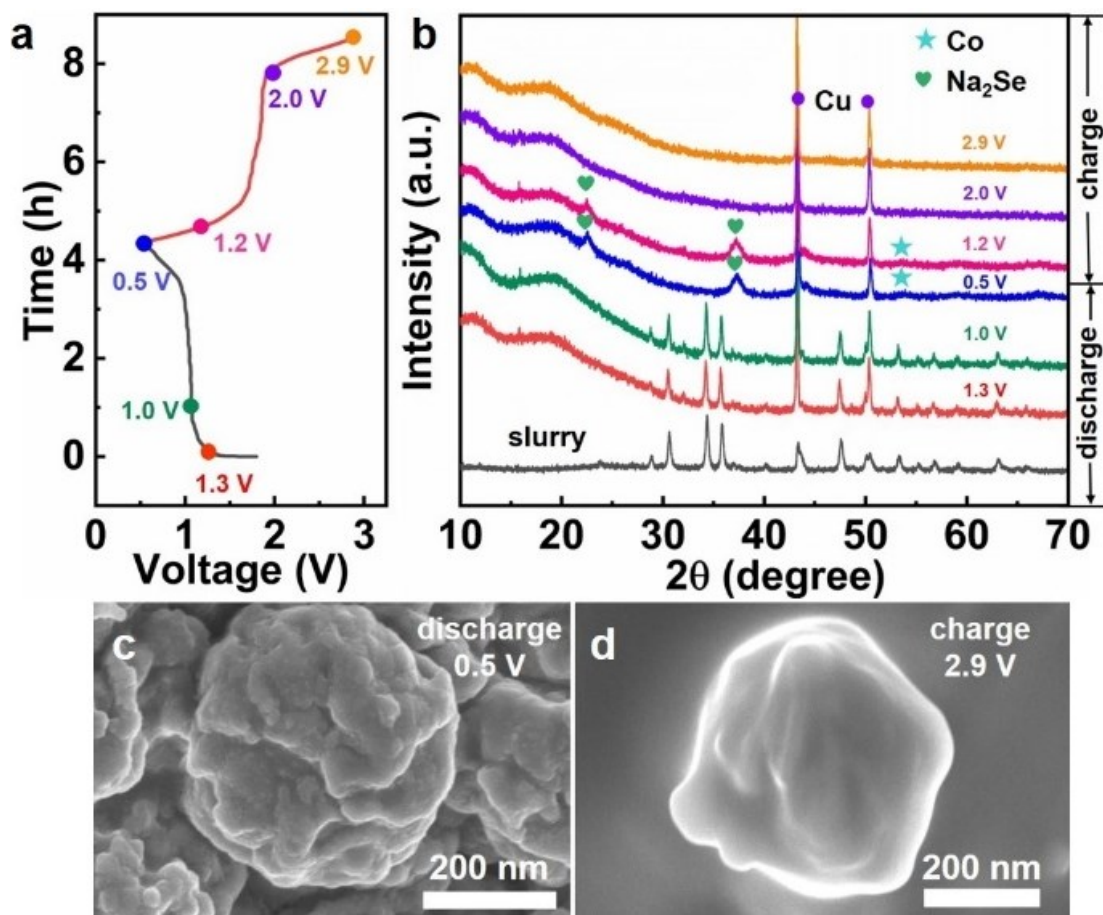

**Fig. S14** (a) Charge-discharge curves of the first cycle at  $100 \text{ mA g}^{-1}$ , (b) ex-situ XRD patterns of  $\text{CoSe}_2/\text{C}$  for SIBs, SEM images of  $\text{CoSe}_2/\text{C}$  (c) discharge to 0.5 V, (d) charge to 2.9 V.

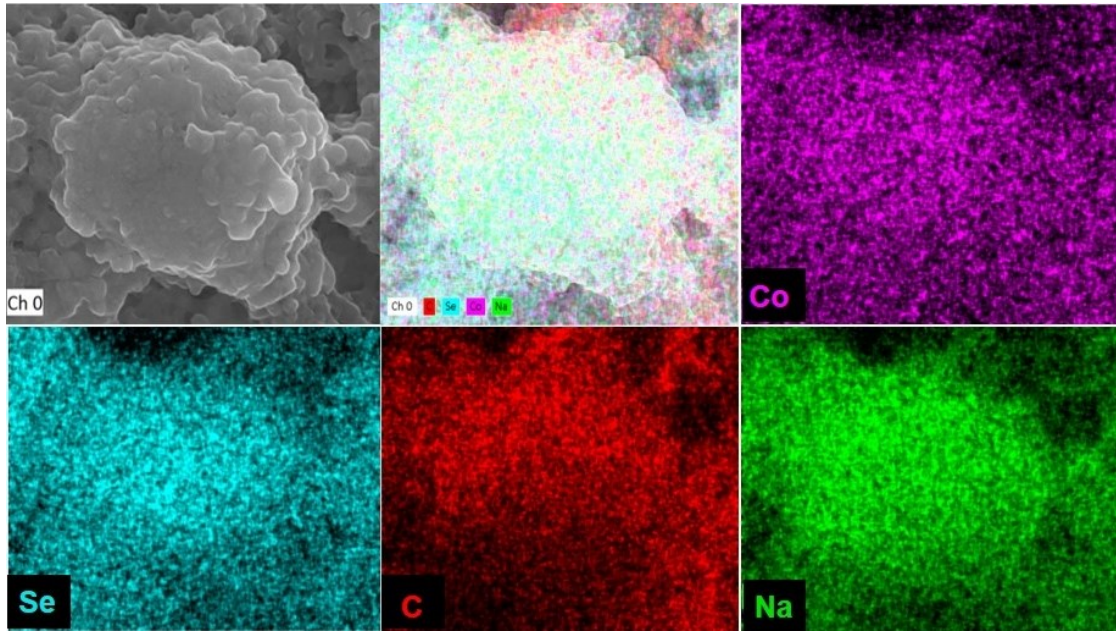

**Fig. S15** Elemental mapping of  $\text{CoSe}_2/\text{C}$  after 100 cycles at  $500 \text{ mA g}^{-1}$  for SIBs.



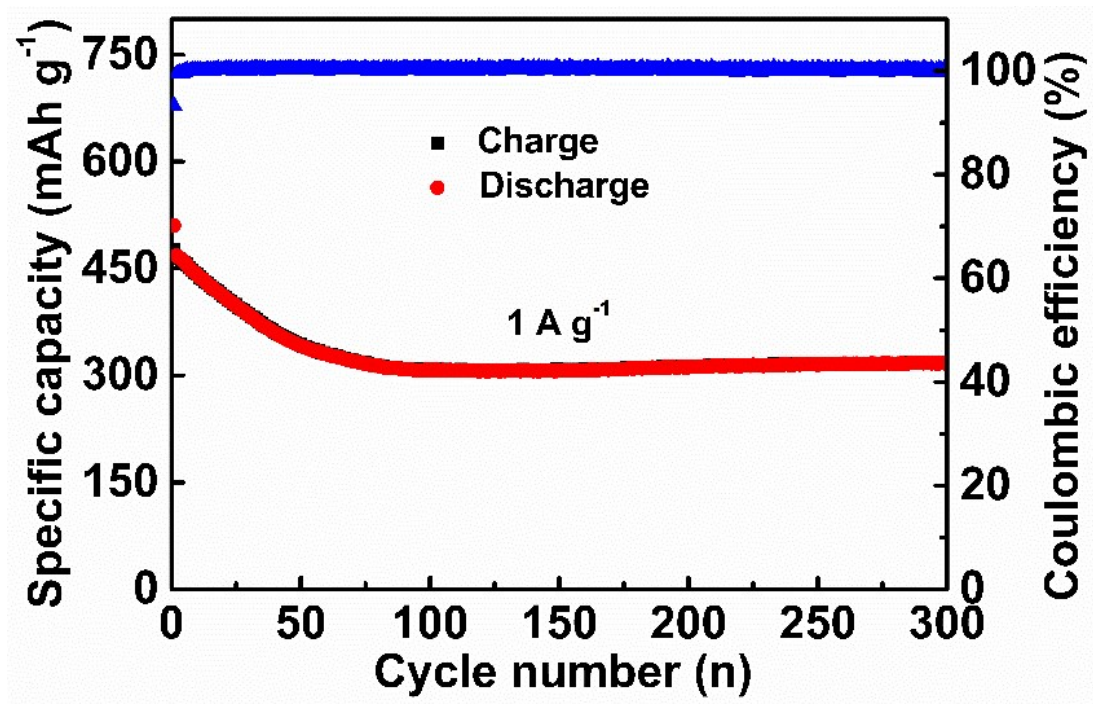

Fig. S16 Cycling performance of CoSe<sub>2</sub>/C at 1 A g<sup>-1</sup> in SIBs.

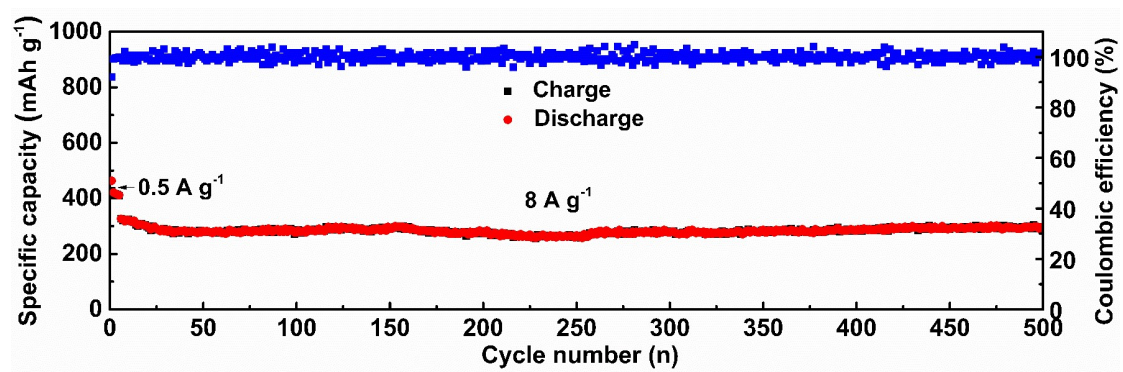

Fig. S17 Cycling performance of CoSe<sub>2</sub>/C at 8 A g<sup>-1</sup> in SIBs.



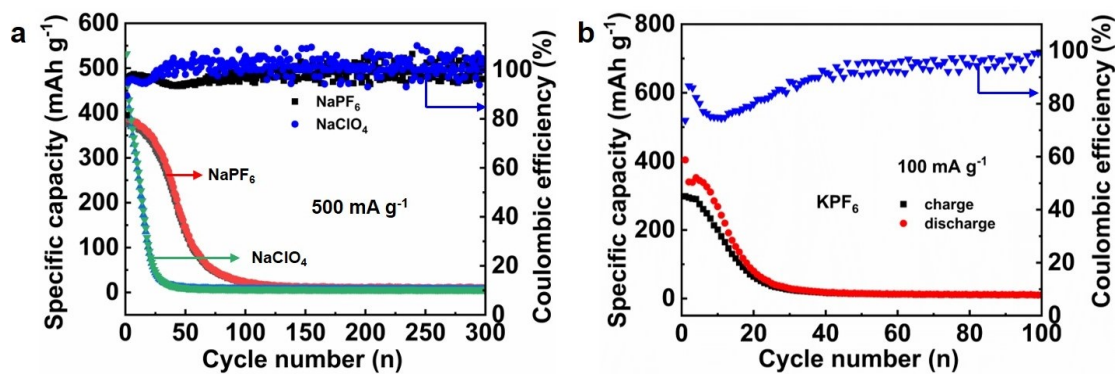

**Fig. S18** The cycling performances at 500 mA g<sup>-1</sup> in different electrolyte for SIBs (a) 1 M NaClO<sub>4</sub> in EC: DEC (1:1 Vol%) containing 5 wt.% FEC and 1 M NaPF<sub>6</sub> in EC: DEC (1:1 Vol%) containing 2 wt.% FEC, the cycling performances at 100 mA g<sup>-1</sup> (b) 0.8 M KPF<sub>6</sub> in EC: DEC (1:1 Vol%) was used as electrolyte for PIBs.

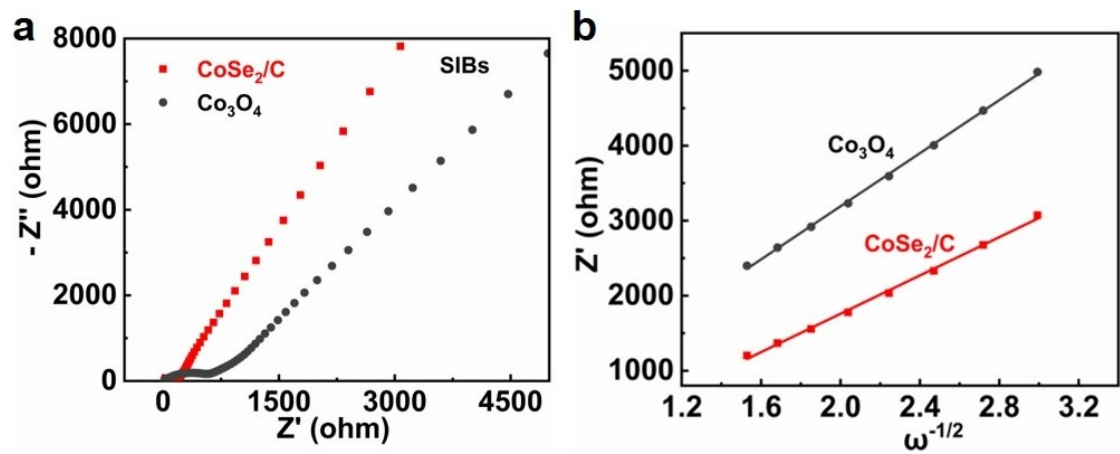

**Fig. S19** (a) Electrochemical impedance spectra of  $\text{CoSe}_2/\text{C}$  and  $\text{Co}_3\text{O}_4$  before cycle for SIBs, (b) The relationship between  $Z'$  and  $\omega^{-1/2}$  for  $\text{CoSe}_2/\text{C}$  and  $\text{Co}_3\text{O}_4$  in the low-frequency region.

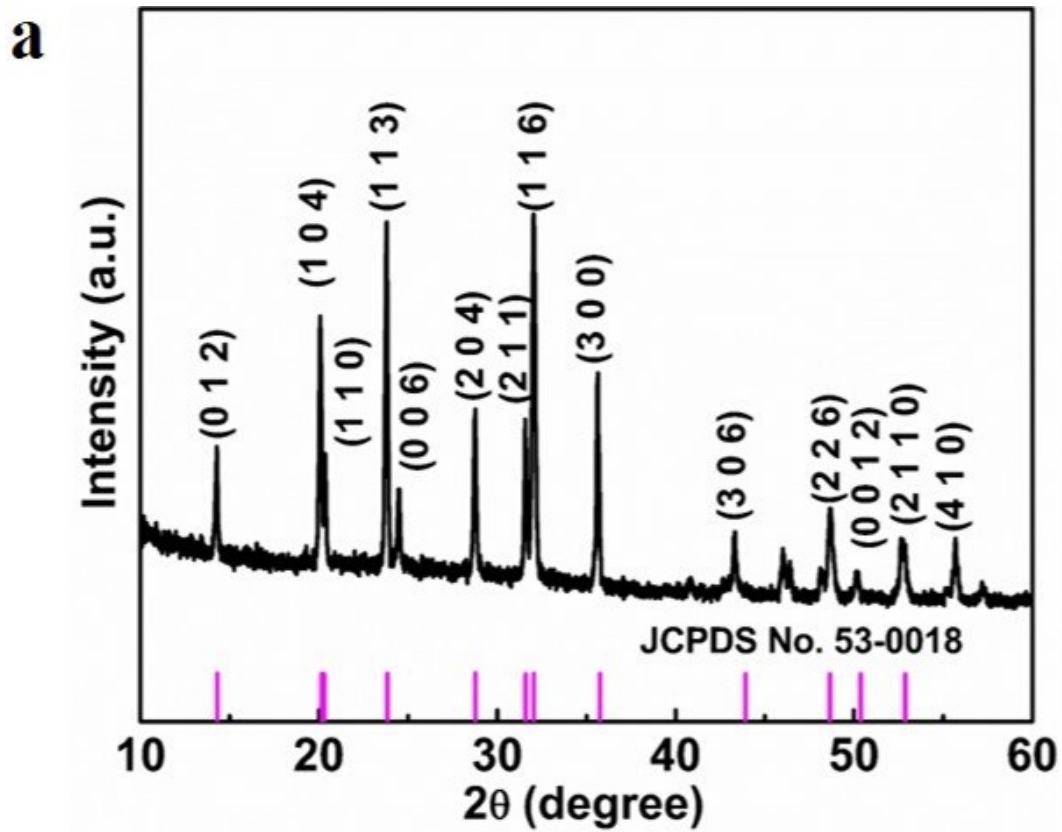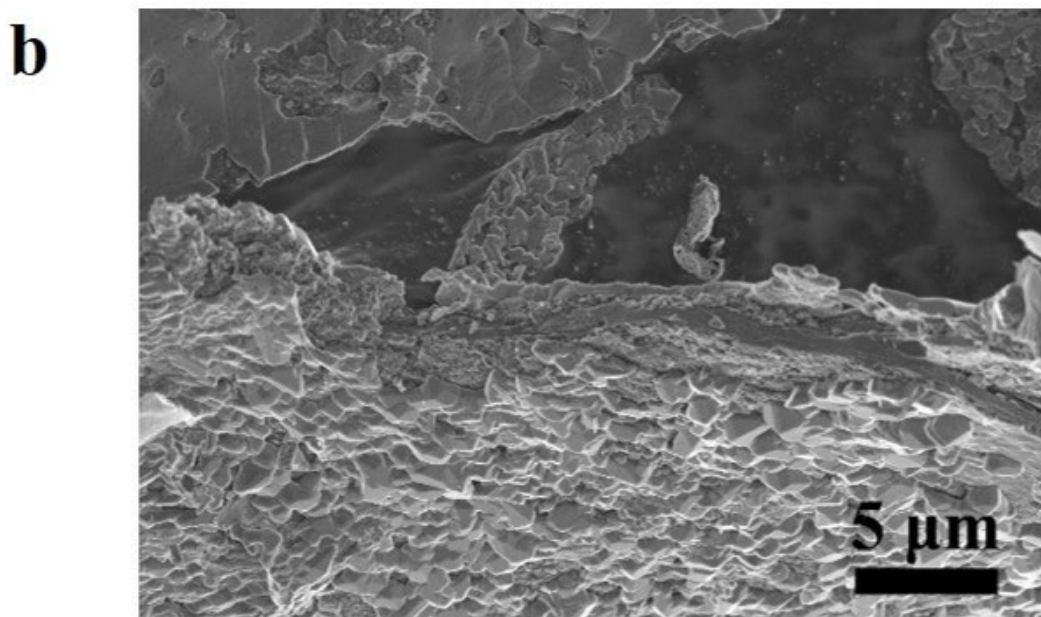

Fig. S20 (a) XRD pattern, (b) FESEM image of  $\text{Na}_3\text{V}_2(\text{PO}_4)_3@\text{rGO}$ .

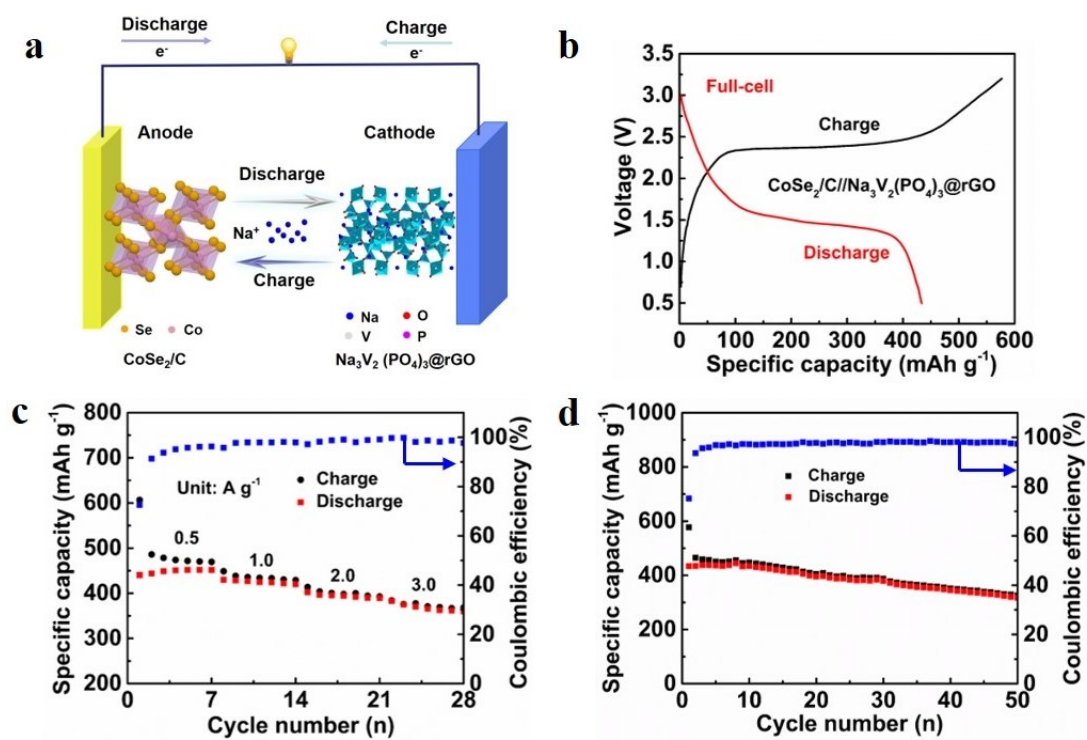

**Fig. S21** (a) The working principle of SIBs full-cell with a  $\text{CoSe}_2/\text{C}$  anode and a  $\text{Na}_3\text{V}_2(\text{PO}_4)_3/\text{rGO}$  cathode, (b) charge-discharge curves of the 1<sup>st</sup> cycle at  $1\text{ A g}^{-1}$ , (c) rate performance, (d) cycling performances of  $\text{CoSe}_2/\text{C}/\text{Na}_3\text{V}_2(\text{PO}_4)_3/\text{rGO}$  in SIBs full-cell at  $1\text{ A g}^{-1}$ .

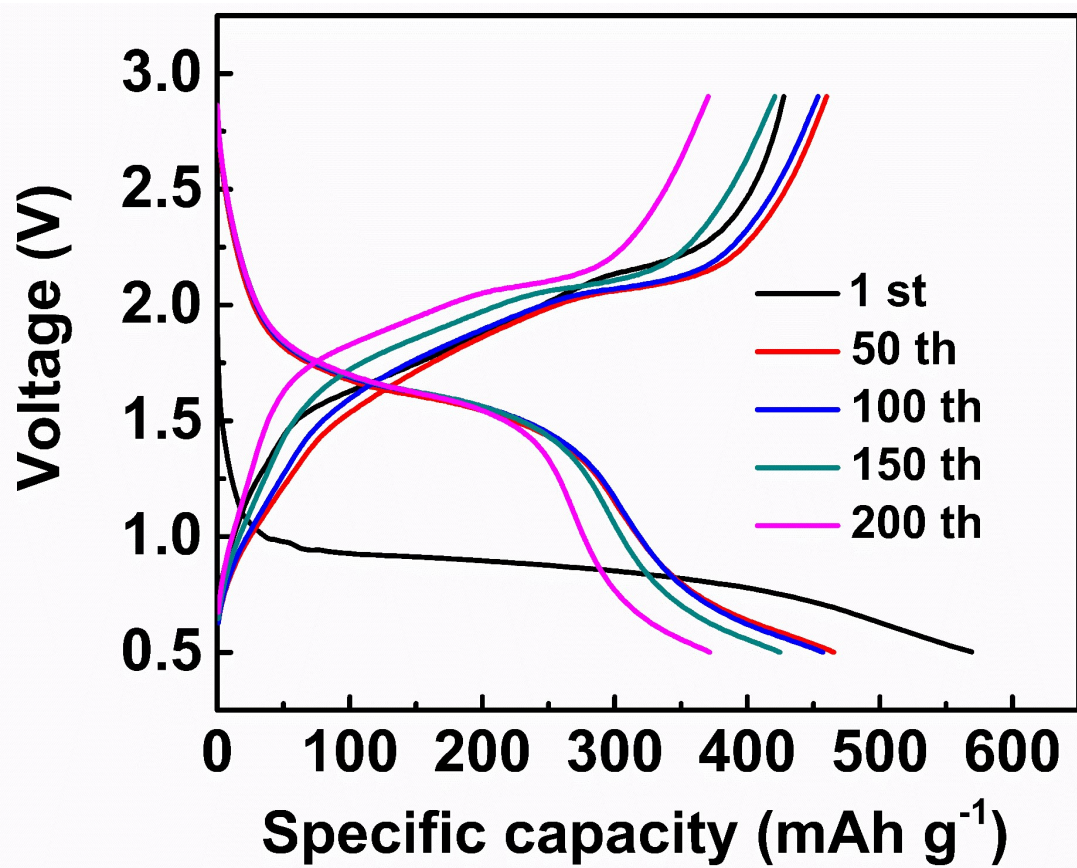

Fig. S22 Charge-discharge curves of CoSe<sub>2</sub>/C at 50 mA g<sup>-1</sup> in PIBs.

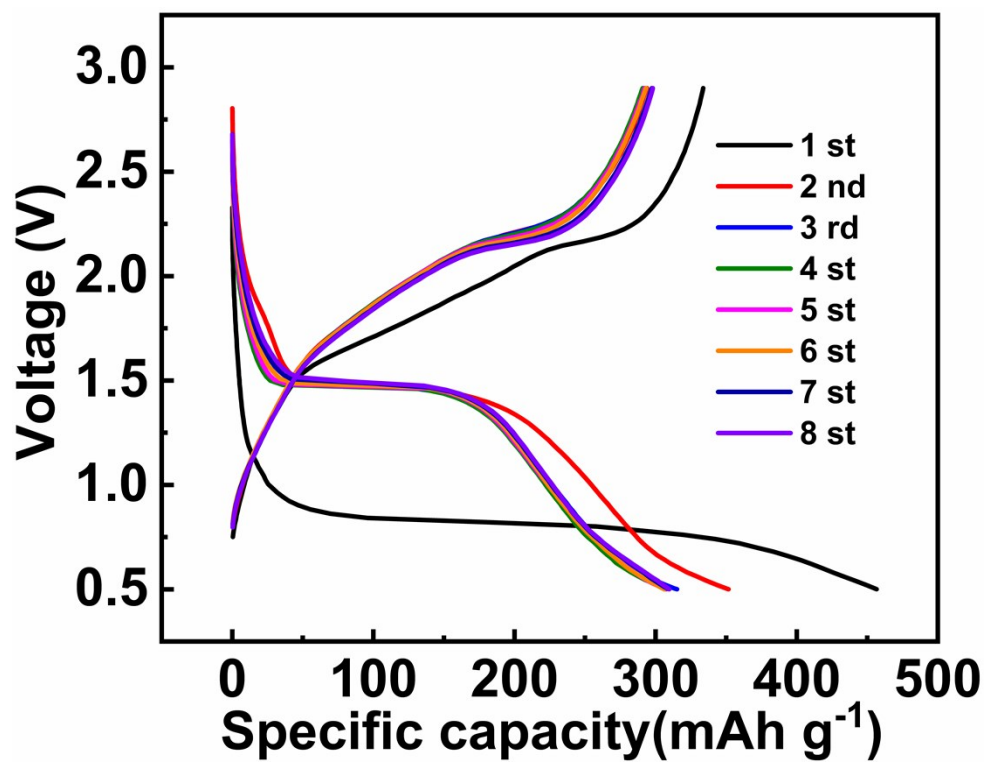

**Fig. S23** When the mass load of CoSe<sub>2</sub>/C was 6.3 mg cm<sup>-2</sup> as anode for potassium ion battery, charge-discharge curves at 50 mA g<sup>-1</sup>.



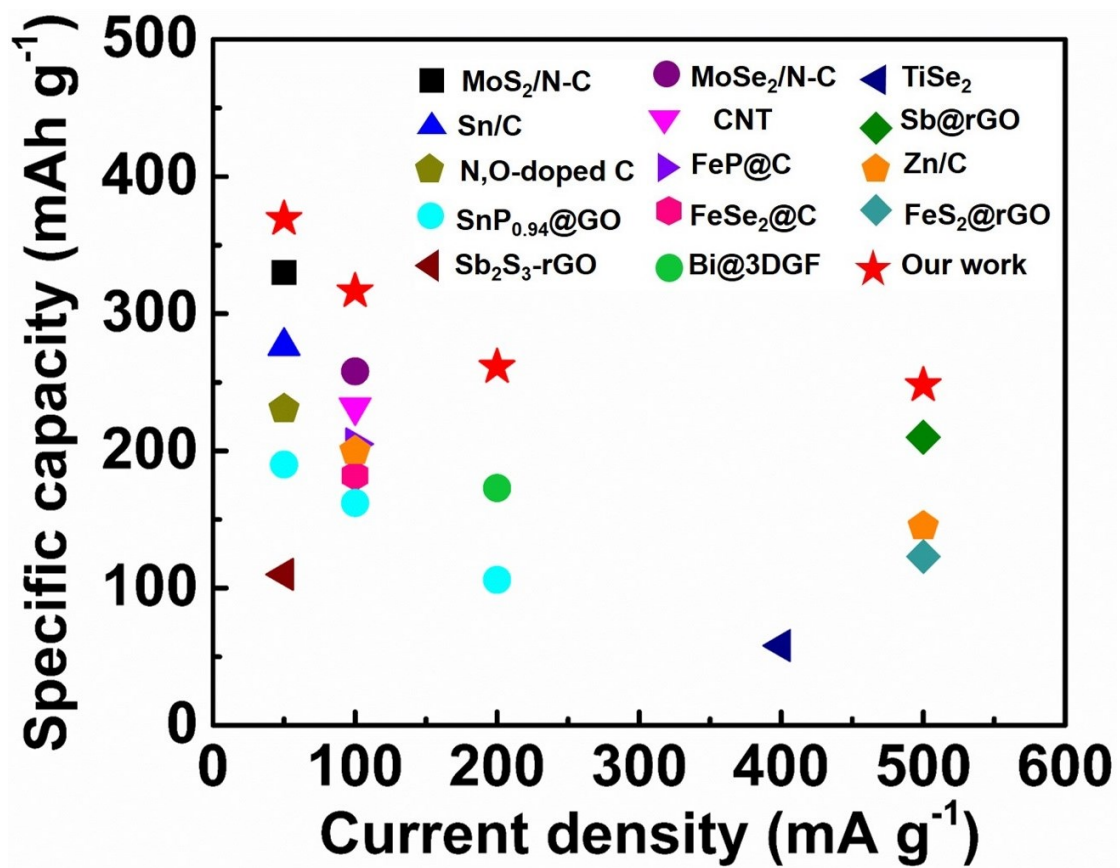

Fig. S24 Comparison the performance of CoSe<sub>2</sub>/C with recently reported materials in PIBs.

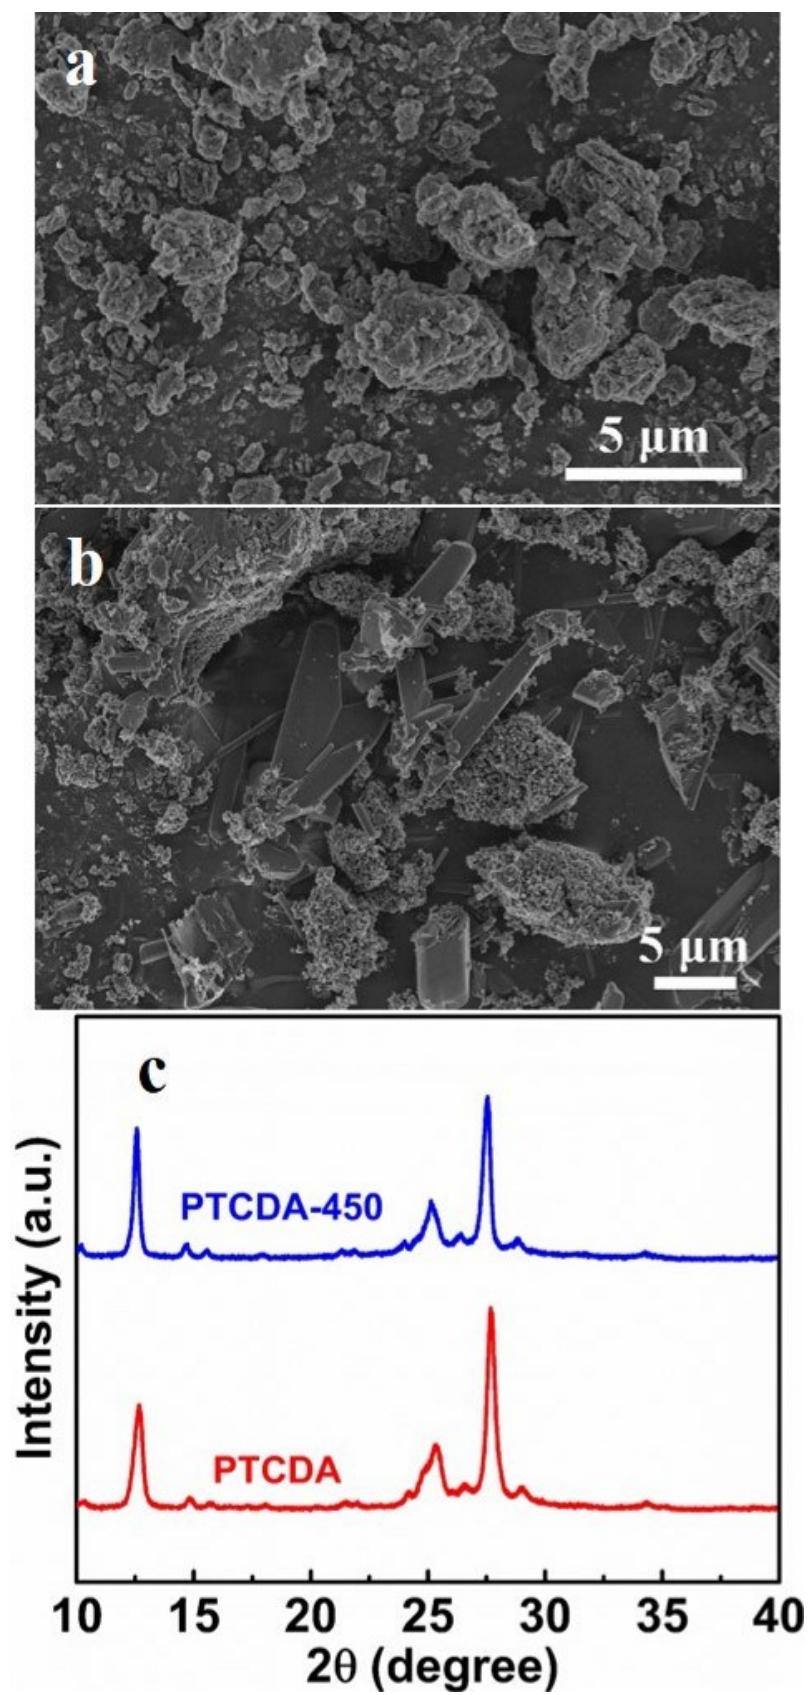

**Fig. S25** FESEM images of (a) PTCDA, (b) PTCDA-450, (c) XRD patterns of PTCDA and PTCDA-450.

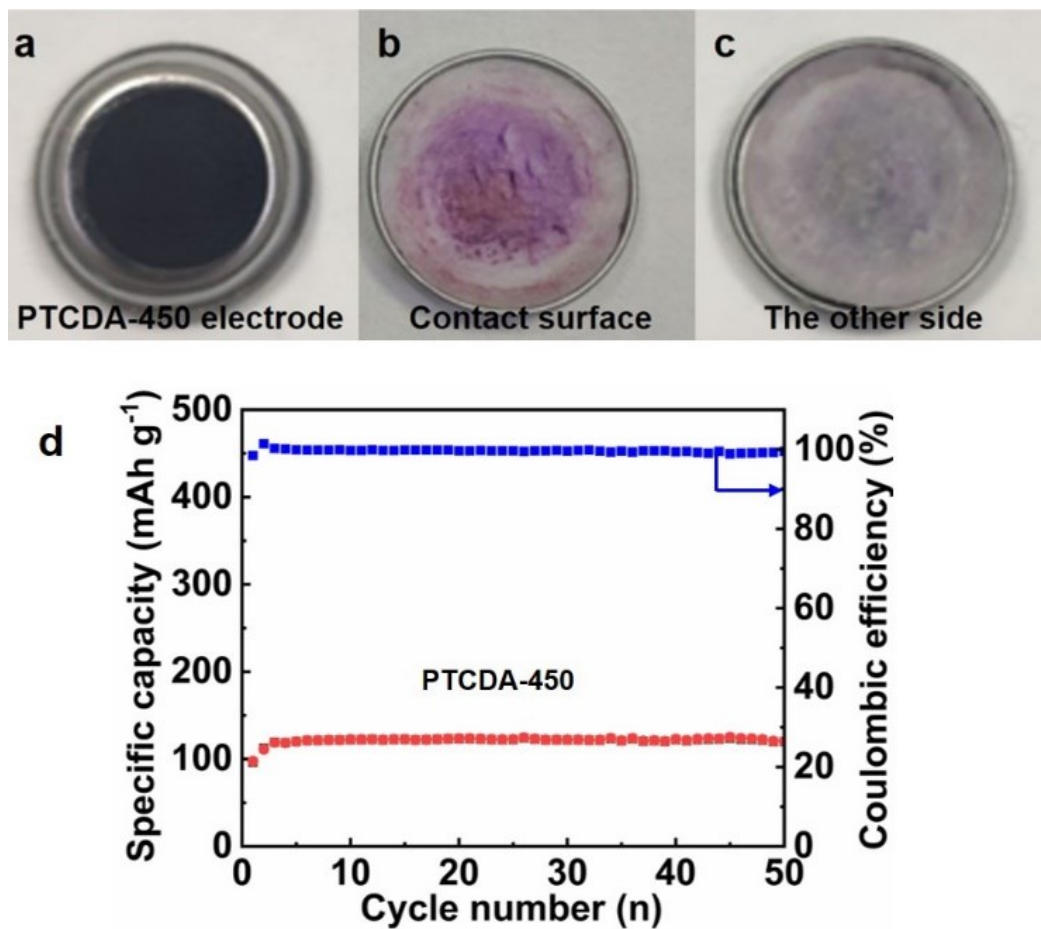

**Fig. S26** Photos of disassembled battery after cycling (a) the electrode of PTCDA-450, (b) the side of separator contact with PTCDA-450 electrode directly, (c) the other side of separator, (d) the cycling performance of PTCDA-450 at 100 mA g<sup>-1</sup> in half potassium ion battery.

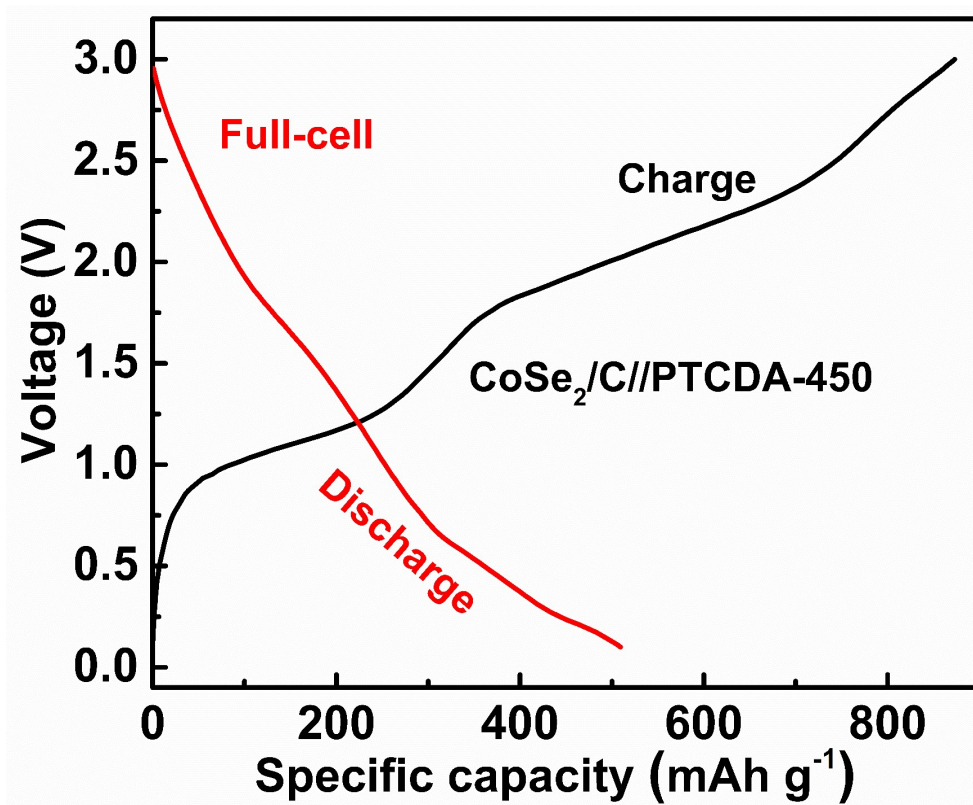

**Fig. S27** The charge-discharge curves of CoSe<sub>2</sub>/C//PTCDA-450 of the first cycle at 100 mA g<sup>-1</sup> in PIBs full-cell.

**Table S1.** Comparison of electrochemical performance of CoSe<sub>2</sub>/C with previous reported anode materials for PIBs.

| Sample                                             | Current density (mA g <sup>-1</sup> ) | Cycle number | Reversible capacity (mAh g <sup>-1</sup> ) | Ref.      |
|----------------------------------------------------|---------------------------------------|--------------|--------------------------------------------|-----------|
| MoS <sub>2</sub> /N-C                              | 50                                    | 50           | 330                                        | 1         |
| Sn/C                                               | 50                                    | 100          | 276.4                                      | 2         |
| N, O-doped C                                       | 50                                    | 100          | 230.6                                      | 3         |
| SnP <sub>0.94</sub> @GO                            | 200                                   | 100          | 106                                        | 4         |
| Sb <sub>2</sub> O <sub>3</sub> -rGO                | 50                                    | 50           | 110                                        | 5         |
| MoSe <sub>2</sub> /N-C                             | 100                                   | 300          | 258.02                                     | 6         |
| CNT                                                | 100                                   | 500          | 232                                        | 7         |
| FeP@C                                              | 100                                   | 300          | 205                                        | 8         |
| FeSe <sub>2</sub> @C                               | 100                                   | 100          | 182                                        | 9         |
| Bi@3DGF                                            | 200                                   | 50           | 173                                        | 10        |
| TiSe <sub>2</sub>                                  | 400                                   | 300          | ~50                                        | 11        |
| Sb@rGO                                             | 500                                   | 200          | 210                                        | 12        |
| Zn/C-600                                           | 100                                   | 100          | 200                                        | 13        |
| FeS <sub>2</sub> @rGO                              | 500                                   | 420          | 123                                        | 14        |
| CoSe <sub>2</sub> /C                               | 50                                    | 200          | 369.2                                      | This work |
|                                                    | 100                                   | 200          | 316.4                                      | This work |
|                                                    | 200                                   | 200          | 261.3                                      | This work |
|                                                    | 500                                   | 200          | 248.1                                      | This work |
| CoSe <sub>2</sub> /C//PTCDA-450 ( PIBs full-cell ) | 100                                   | 70           | 235.5                                      | This work |

**Table S2.** Comparison of electrochemical performance of CoSe<sub>2</sub>/C with previous reported anode materials for SIBs.

| Sample                                                                                                                | Current density<br>(A g <sup>-1</sup> ) | Cycle number | Reversible capacity<br>(mAh g <sup>-1</sup> ) | Current density<br>(A g <sup>-1</sup> ) | Rate capacity<br>(mAh g <sup>-1</sup> ) | Ref.         |
|-----------------------------------------------------------------------------------------------------------------------|-----------------------------------------|--------------|-----------------------------------------------|-----------------------------------------|-----------------------------------------|--------------|
| CoSe <sub>2</sub> @NC                                                                                                 | 0.2                                     | 200          | 374                                           | 6.4                                     | ~200                                    | 15           |
| CNT/CoSe <sub>2</sub> /C                                                                                              | ~                                       | ~            | ~                                             | 2.4                                     | 223.6                                   | 16           |
| CoSe <sub>2</sub> @NC                                                                                                 | 2                                       | 1800         | 384.3                                         | 5                                       | 276.4                                   | 17           |
| CoSe <sub>2</sub>                                                                                                     | 1                                       | 1690         | 220                                           | 5                                       | 150                                     | 18           |
| Cu-doped<br>CoSe <sub>2</sub>                                                                                         | 1                                       | 500          | ~350                                          | 3                                       | 185                                     | 19           |
| Ni <sub>3</sub> S <sub>2</sub> /Co <sub>9</sub> S <sub>8</sub>                                                        | 0.1                                     | 100          | 419.9                                         | 2                                       | 323.2                                   | 20           |
| NiS <sub>2</sub>                                                                                                      | 0.5                                     | 100          | 186.9                                         | 0.5                                     | 209.8                                   | 21           |
| Fe <sub>1-x</sub> S                                                                                                   | 1                                       | 800          | 241.1                                         | 3.2                                     | 179.0                                   | 22           |
| WSe <sub>2</sub> /C                                                                                                   | 0.1                                     | 90           | 257.8                                         | 2                                       | 114.4                                   | 23           |
| CuS                                                                                                                   | 0.1                                     | 100          | 361.7                                         | 5                                       | 246.40.1                                | 24           |
| MoSe <sub>2</sub>                                                                                                     | 1                                       | 200          | 360                                           | 5                                       | 281                                     | 25           |
| CoSe <sub>2</sub> /C                                                                                                  | 4                                       | 1600         | 312.1                                         | 3                                       | 322.0                                   | This<br>work |
|                                                                                                                       | 8                                       | 500          | 297.6                                         | 5                                       | 292.8                                   |              |
|                                                                                                                       |                                         |              |                                               | 8                                       | 266.5                                   |              |
| CoSe <sub>2</sub> /C//<br>Na <sub>3</sub> V <sub>2</sub> (PO <sub>4</sub> ) <sub>3</sub> @<br>rGO<br>(SIBs full-cell) | 1                                       | 50           | 320.9                                         | 0.5                                     | 451.7                                   | This<br>work |
|                                                                                                                       |                                         |              |                                               | 1.0                                     | 420.2                                   |              |
|                                                                                                                       |                                         |              |                                               | 2.0                                     | 389.4                                   |              |
|                                                                                                                       |                                         |              |                                               | 3.0                                     | 360.0                                   |              |



## References:

- 1 B. Jia, Q. Yu, Y. Zhao, M. Qin, W. Wang, Z. Liu, C.-Y. Lao, Y. Liu, H. Wu, Z. Zhang and X. Qu, *Adv. Funct. Mater.* 2018, **28**, 1803409.
- 2 K. Huang, Z. Xing, L. Wang, X. Wu, W. Zhao, X. Qi, H. Wang and Z. Ju, *J. Mater. Chem. A* 2018, **6**, 434-442.
- 3 J. Yang, Z. Ju, Y. Jiang, Z. Xing, B. Xi, J. Feng and S. Xiong, *Adv. Mater.* 2018, **30**, 1700104.
- 4 X. Zhao, W. Wang, Z. Hou, G. Wei, Y. Yu, J. Zhang and Z. Quan, *Chem. Eng. J.* 2019, **370**, 677-683.
- 5 V. Lakshmi, A. A. Mikhaylov, A. G. Medvedev, C. Zhang, T. Ramireddy, M. M. Rahman, P. Cizek, D. Golberg, Y. Chen, O. Lev, P. V. Prikhodchenko and A. M. Glushenkov, *J. Mater. Chem. A* 2020, **8**, 11424-11434.
- 6 J. Ge, L. Fan, J. Wang, Q. Zhang, Z. Liu, E. Zhang, Q. Liu, X. Yu and B. Lu, *Adv. Energy Mater.* 2018, **8**, 1801477
- 7 Y. Wang, Z. Wang, Y. Chen, H. Zhang, M. Yousaf, H. Wu, M. Zou, A. Cao and R. P. S. Han, *Adv. Mater.* 2018, **30**, 1802074.
- 8 F. Yang, H. Gao, J. Hao, S. Zhang, P. Li, Y. Liu, J. Chen and Z. Guo, *Adv. Funct. Mater.* 2019, **29**, 1808291.
- 9 T. Wang, W. Guo, G. Wang, H. Wang, J. Bai and B. Wang, *J. Alloys Compd.* 2020, **834**, 155265.
- 10 X. Cheng, D. Li, Y. Wu, R. Xu and Y. Yu, *J. Mater. Chem. A* 2019, **7**, 4913-4921.
- 11 P. Li, X. Zheng, H. Yu, G. Zhao, J. Shu, X. Xu, W. Sun and S. X. Dou, *Energy Storage Mater.* 2019, **16**, 512-518.
- 12 Z. Yi, N. Lin, W. Zhang, W. Wang, Y. Zhu and Y. Qian, *Nanoscale*, 2018, **10**, 13236-13241.
- 13 C. Yan, X. Gu, L. Zhang, Y. Wang, L. Yan, D. Liu, L. Li, P. Dai and X. Zhao, *J. Mater. Chem. A* 2018, **6**, 17371-17377.
- 14 J. Xie, Y. Zhu, N. Zhuang, H. Lei, W. Zhu, Y. Fu, M. S. Javed, J. Li, W. Mai, *Nanoscale*, 2018, **10**, 17092-17098.
- 15 B. Zhao, Q. Liu, G. Wei, J. Wang, X.-Y. Yu, X. Li and H. B. Wu, *Chem. Eng. J.* 2019, **378**, 122206.
- 16 M. Yousaf, Y. Chen, H. Tabassum, Z. Wang, Y. Wang, A. Y. Abid, A. Mahmood, N. Mahmood, S. Guo, R. P. S. Han and P. Gao, *Adv. Sci.* 2020, **7**, 1902907.
- 17 T. Liu, Y. Li, S. Hou, C. Yang, Y. Guo, S. Tian and L. Zhao, *Chem.* 2020, DOI: 10.1002/chem.202000072.
- 18 X. Ma, L. Zou and W. Zhao, *Chem. Commun.* 2018, **54**, 10507-10510.
- 19 Y. Fang, X. Y. Yu and X. W. Lou, *Adv. Mater.* 2018, **30**, 1706668.
- 20 X. Liu, F. Zou, K. Liu, Z. Qiang, C. J. Taubert, P. Ustriyana, B. D. Vogt and Y. Zhu, *J. Mater. Chem. A*, 2017, **5**, 11781-11787.
- 21 K. J. Zhu, G. Liu, Y. J. Wang, J. Liu, S. T. Li, L. Y. Yang, S. L. Liu, H. Wang and T. Xie, *Mater. Lett.* 2017, **197**, 180-183.

- 22 S. Zhang, J. Mi, H. Zhao, W. Ma, L. Dang and L. Yue, *J. Alloys Compd.* 2020, **842**, 155642.
- 23 J. Li, S. Han, J. Zhang, J. Xiang, X. Zhu, P. Liu, X. Li, C. Feng, B. Xiang and M. Gu, *J. Mater. Chem. A*, 2019, **7**, 19898-19908.
- 24 L. Wu, J. Gao, Z. Qin, Y. Sun, R. Tian, Q. Zhang and Y. Gao, *J. Power Sources*, 2020, **479**, 228518.
- 25 Q. Su, X. Cao, T. Yu, X. Kong, Y. Wang, J. Chen, J. Lin, X. Xie, S. Liang and A. Pan, *J. Mater. Chem. A*, 2019, **7**, 22871-22878.
